# Supplementary material for: Edge-doped substituents as an emerging atomic-level strategy for enhancing M–N4–C single-atom catalysts in electrocatalysis of the ORR, OER, and HER
Source: Royal Society of Chemistry journal article supplement (doi:10.1039/d4nh00424h), 2024-11-06
Supplement: d4nh00424h1.pdf [file d4nh00424h1.pdf]

## Supporting information

### Edge-doped substituents as an emerging atomic-level strategy for enhancing M-N<sub>4</sub>-C single-atom catalysts in electrocatalysis of ORR, OER, and HER

Liang Xie<sup>a</sup>, Wei Zhou<sup>a\*</sup>, Zhibin Qu<sup>a</sup>, Yuming Huang<sup>a</sup>, Longhao Li<sup>a</sup>, Chaowei Yang<sup>a</sup>, Junfeng Li<sup>a</sup>, Xiaoxiao Meng<sup>a</sup>, Fei Sun<sup>a</sup>, Jihui Gao<sup>a</sup>, Guangbo Zhao<sup>a</sup>.

<sup>a</sup> School of Energy Science and Engineering, Harbin Institute of Technology, Harbin, Heilongjiang, 150001 P. R. China

\* Corresponding author:

E-mail addresses: hitzhouw@hit.edu.cn (Wei Zhou)

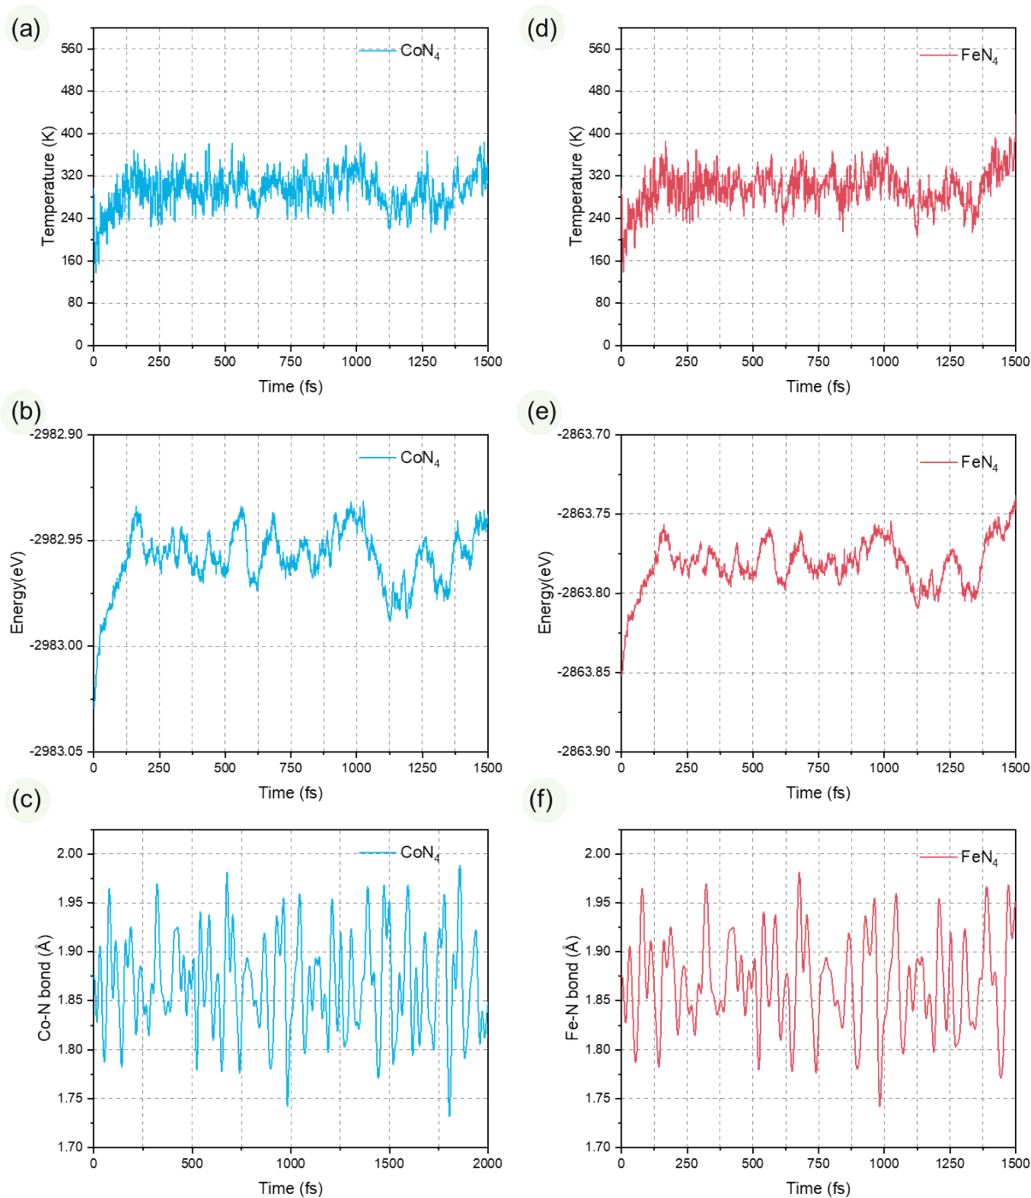

Figure S1. The variations of (a) temperature, (b) energy and (c) Co-N bond versus the AIMD simulation time for 1500fs of  $\text{CoN}_4$  under 298.15 K. The variations of (d) temperature, (e) energy and (f) Fe-N bond versus the AIMD simulation time for 1500fs of  $\text{FeN}_4$  under 298.15 K. Ab initio molecular dynamics calculations at the B97-3c level [1] using ORCA program [2-4] structural relaxation was performed at 298.15K

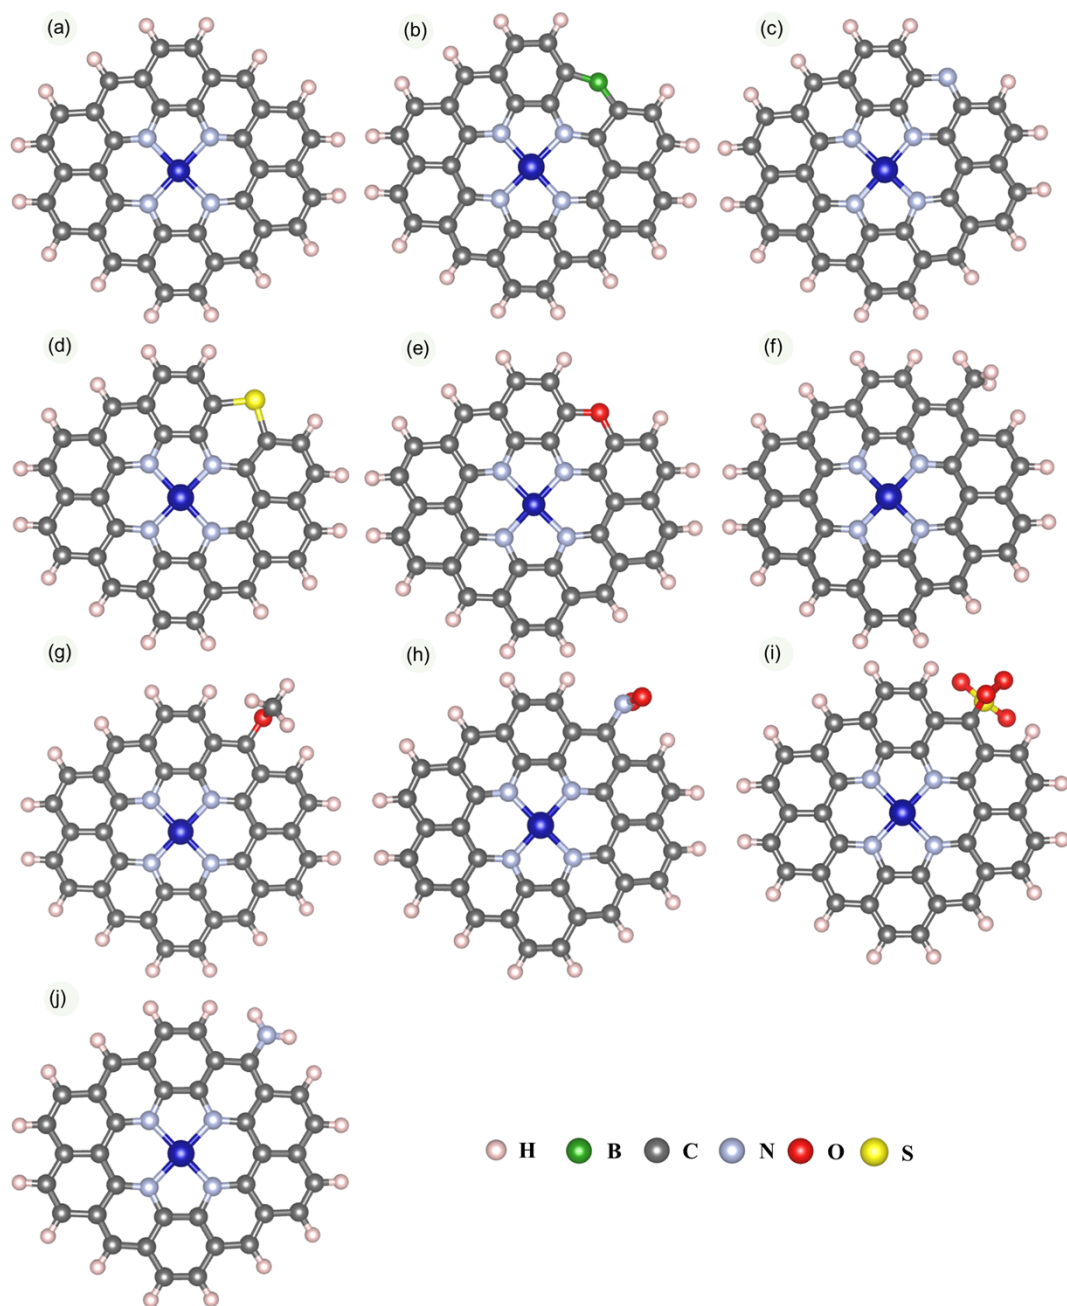

Figure S2. Optimized structure of Sub@FeN<sub>4</sub>. (a) FeN<sub>4</sub>, (b) B@FeN<sub>4</sub>, (c) N@FeN<sub>4</sub>, (d) S@FeN<sub>4</sub>, (e) O@FeN<sub>4</sub>, (f) CH<sub>3</sub>@FeN<sub>4</sub>, (g) OCH<sub>3</sub>@FeN<sub>4</sub>, (h) NO<sub>2</sub>@FeN<sub>4</sub>, (i) SO<sub>4</sub>@FeN<sub>4</sub>, (j) NH<sub>2</sub>@FeN<sub>4</sub>.

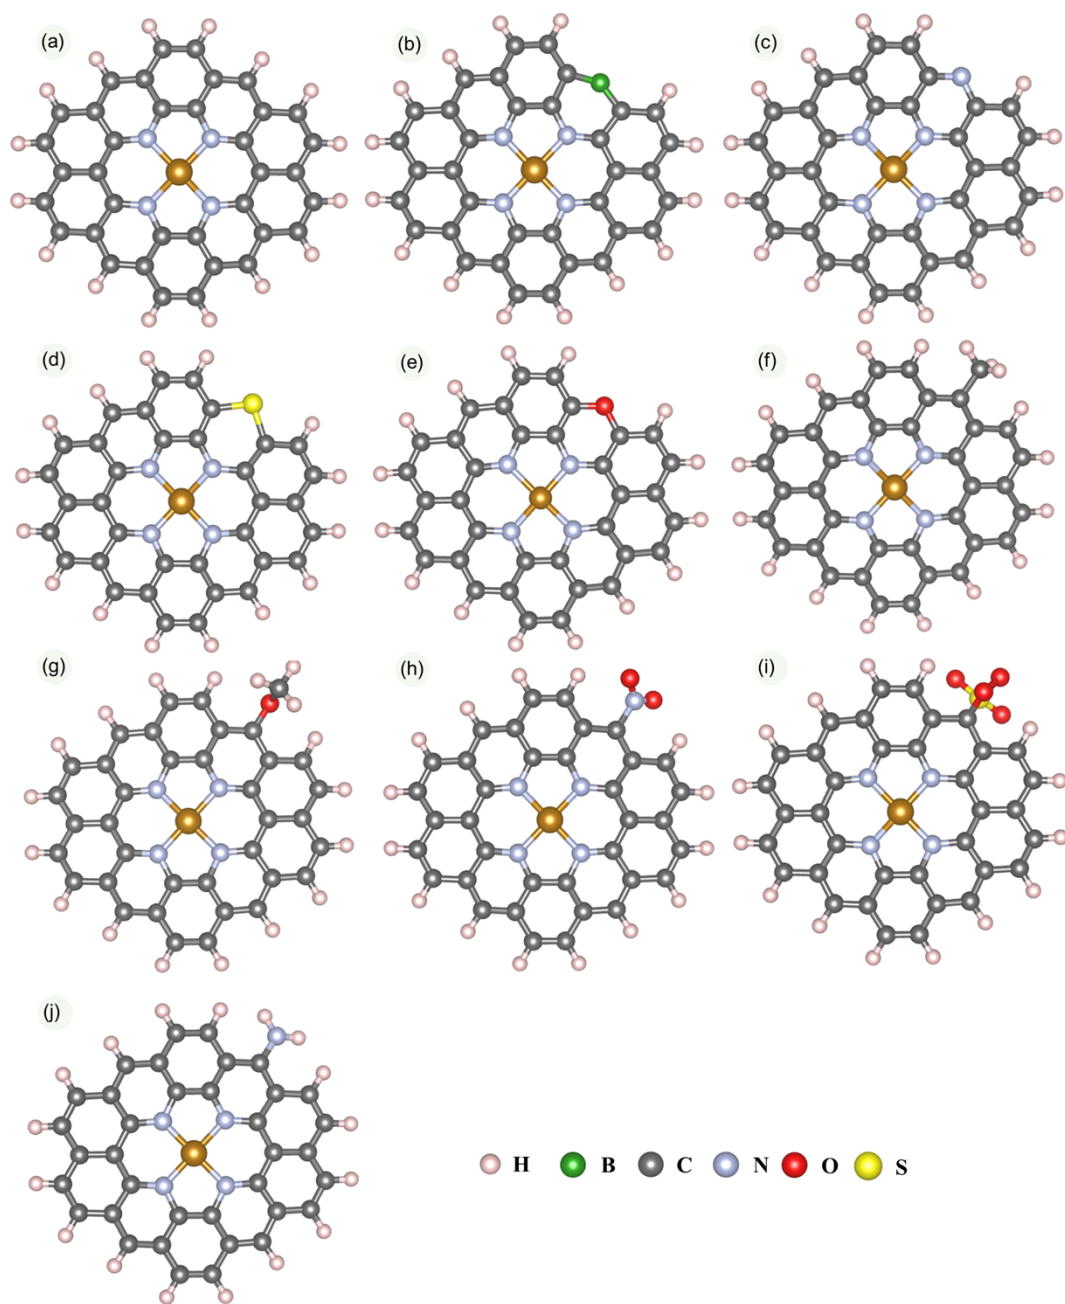

Figure S3. Optimized structure of Sub@CoN<sub>4</sub>. (a) CoN<sub>4</sub>, (b) B@CoN<sub>4</sub>, (c) N@CoN<sub>4</sub>, (d) S@CoN<sub>4</sub>, (e) O@CoN<sub>4</sub>, (f) CH<sub>3</sub>@CoN<sub>4</sub>, (g) OCH<sub>3</sub>@CoN<sub>4</sub>, (h) NO<sub>2</sub>@CoN<sub>4</sub>, (i) SO<sub>4</sub>@CoN<sub>4</sub>, (j) NH<sub>2</sub>@CoN<sub>4</sub>.



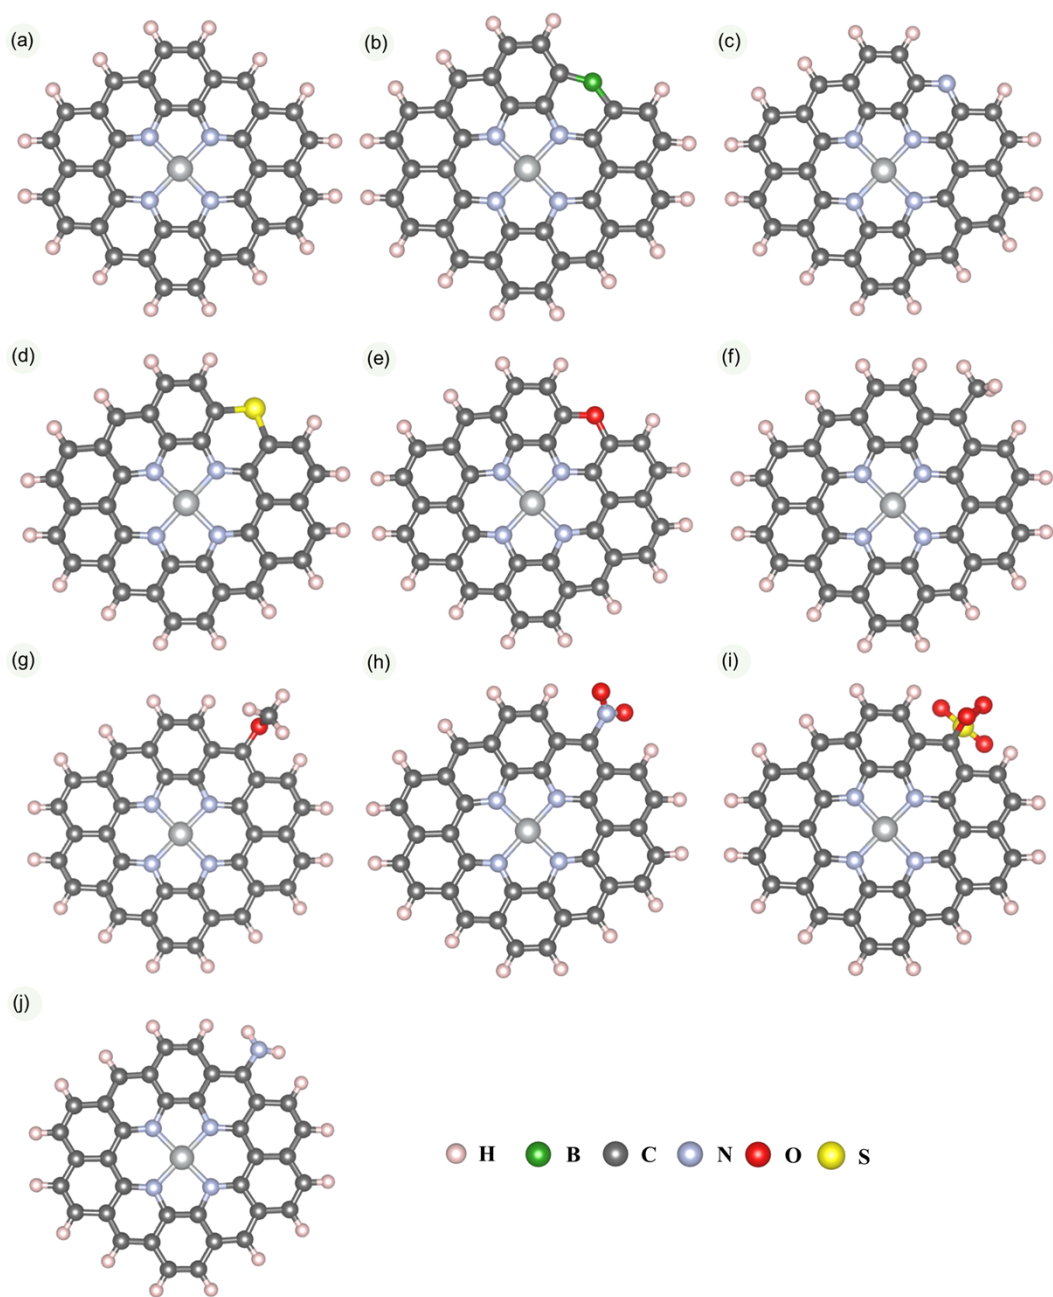

Figure S4. Optimized structure of Sub@NiN<sub>4</sub>. (a) NiN<sub>4</sub>, (b) B@NiN<sub>4</sub>, (c) N@NiN<sub>4</sub>, (d) S@NiN<sub>4</sub>, (e) O@NiN<sub>4</sub>, (f) CH<sub>3</sub>@NiN<sub>4</sub>, (g) OCH<sub>3</sub>@NiN<sub>4</sub>, (h) NO<sub>2</sub>@NiN<sub>4</sub>, (i) SO<sub>4</sub>@NiN<sub>4</sub>, (j) NH<sub>2</sub>@NiN<sub>4</sub>.

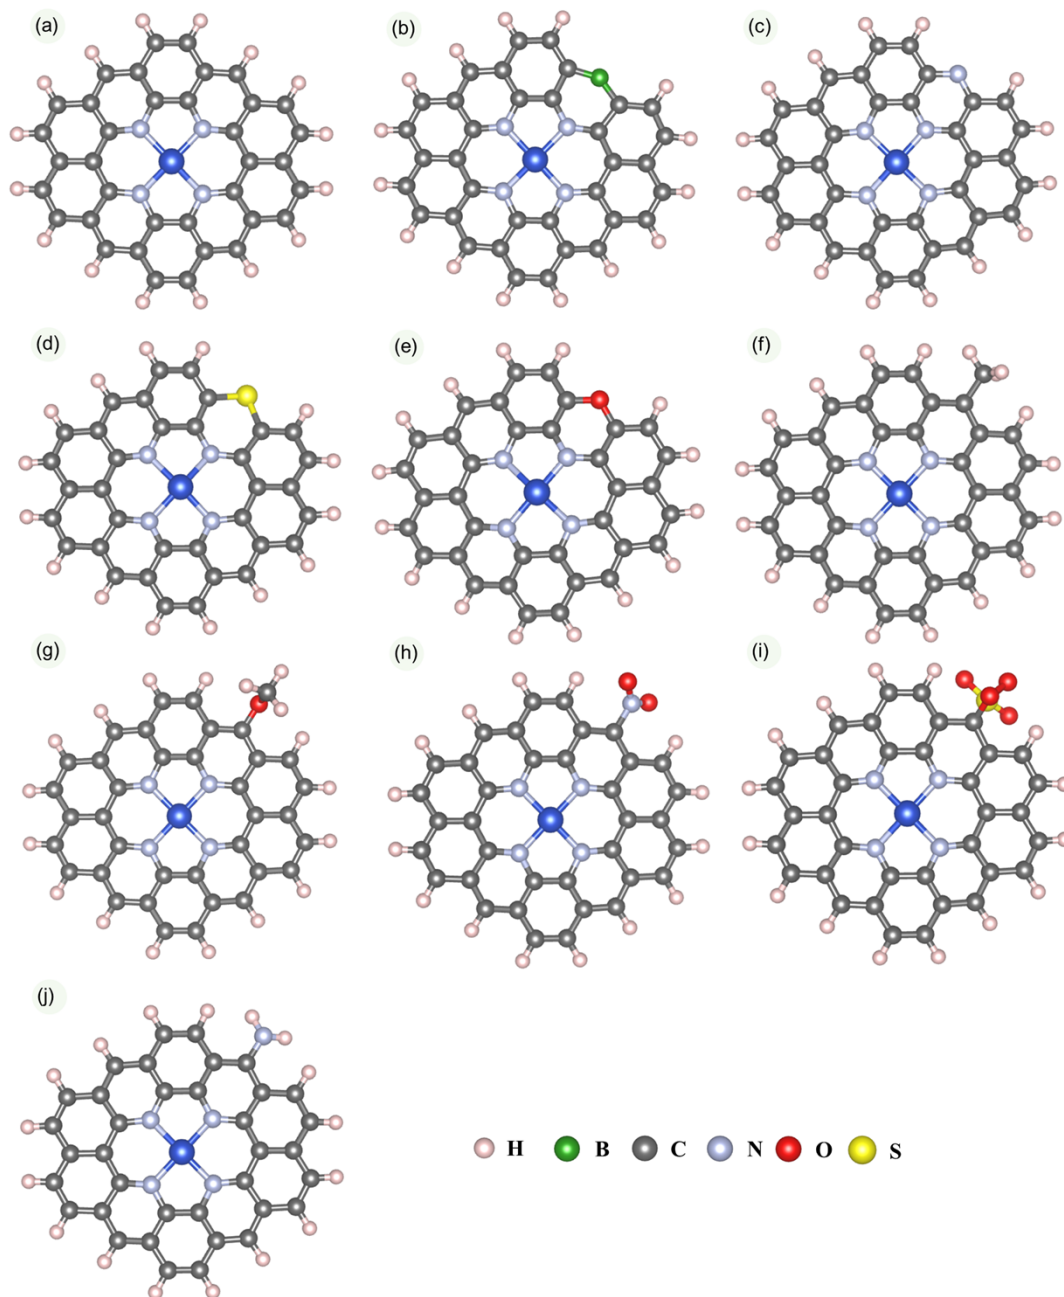

Figure S5. Optimized structure of  $\text{Sub}@CuN_4$ . (a)  $CuN_4$ , (b)  $B@CuN_4$ , (c)  $N@CuN_4$ , (d)  $S@CuN_4$ , (e)  $O@CuN_4$ , (f)  $CH_3@CuN_4$ , (g)  $OCH_3@CuN_4$ , (h)  $NO_2@CuN_4$ , (i)  $SO_4@CuN_4$ , (j)  $NH_2@CuN_4$ .

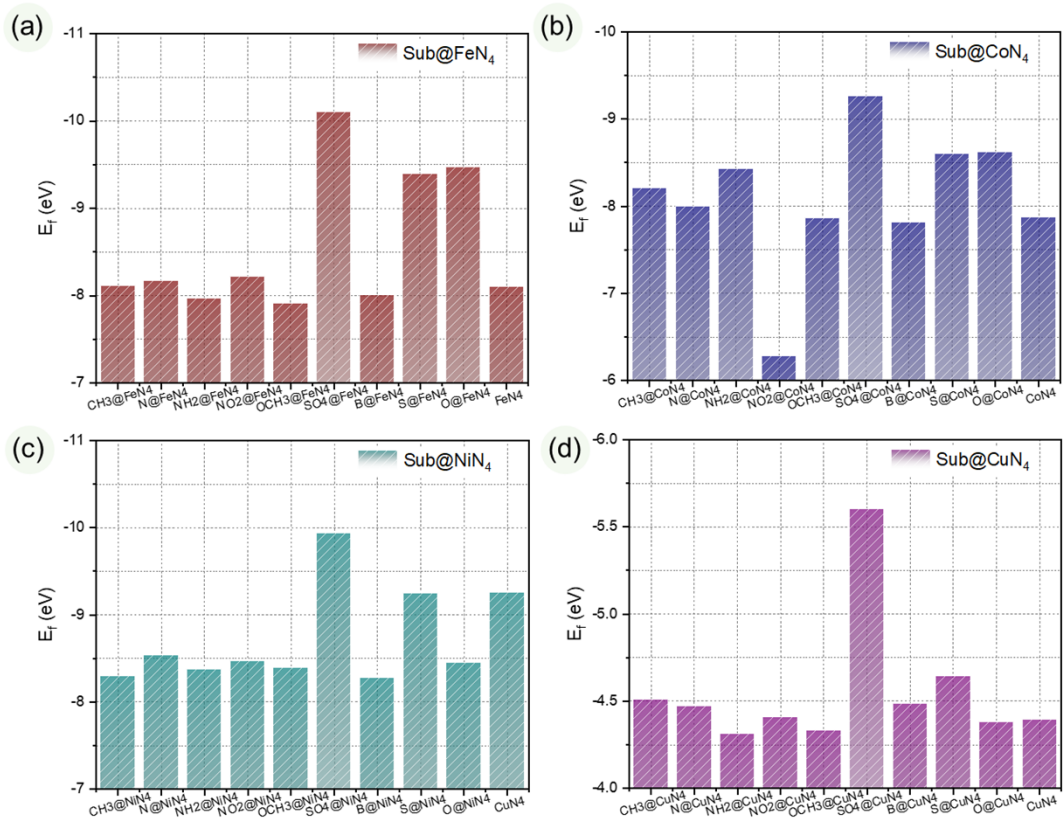

Figure S6 The formation energy of Sub@MN<sub>4</sub>. (a) Sub@FeN<sub>4</sub>; (b) Sub@CoN<sub>4</sub>; (c) Sub@NiN<sub>4</sub>; (d) Sub@CuN<sub>4</sub>. The formula for calculating the formation energy is as follows:  $E_f = E_{\text{Sub@MN}_4} - E_{\text{Sub@N}_4} - E_M$ . In theoretical calculations, this indicator is widely used to assess stability, where  $E_{\text{Sub@MN}_4}$ ,  $E_{\text{Sub@N}_4}$  and  $E_M$  represent the electronic energies of Sub@MN<sub>4</sub>, Sub@N<sub>4</sub> and M, respectively.

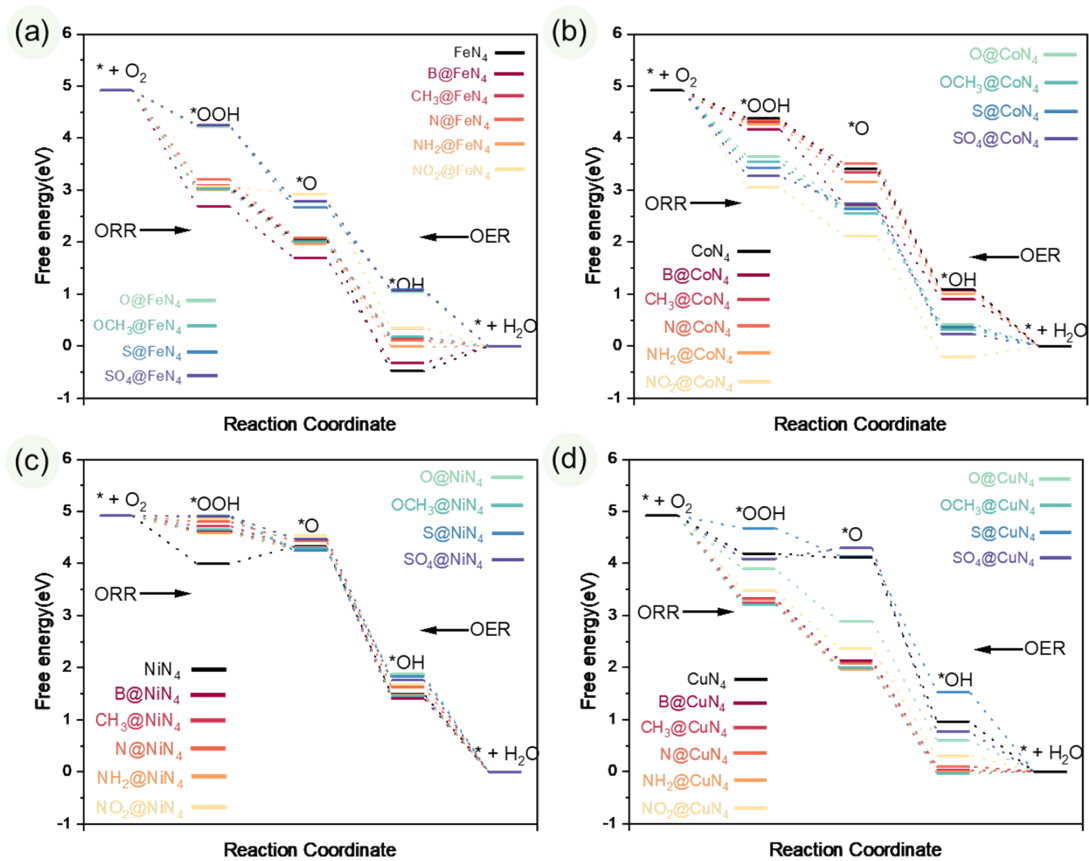

Figure S7. Free energy diagrams for ORR/OER on (a) Sub@FeN<sub>4</sub>, (b) Sub@CoN<sub>4</sub>, (c) Sub@NiN<sub>4</sub>, and (d) Sub@CuN<sub>4</sub> catalysts

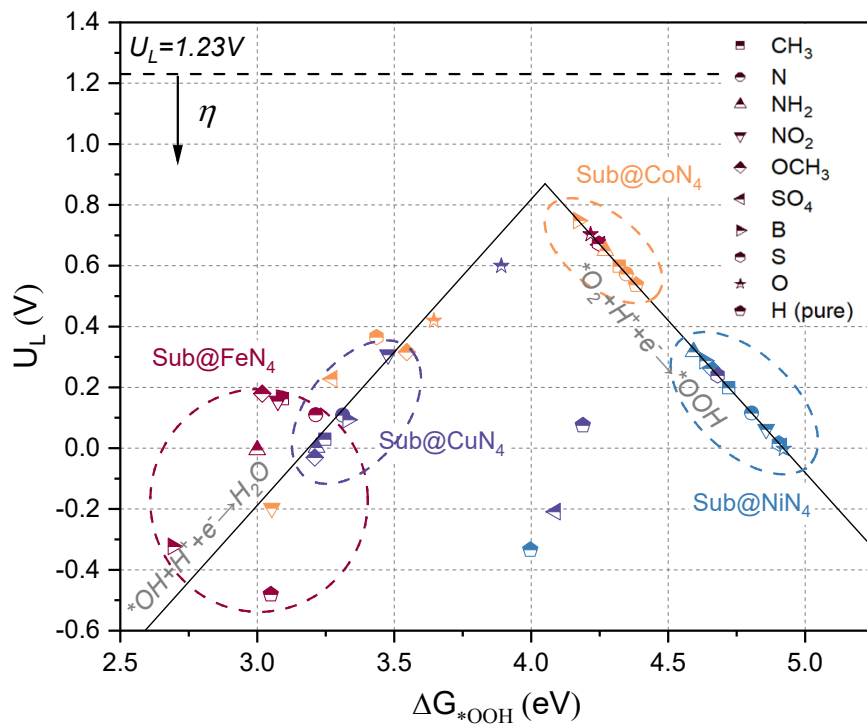

Figure S8. Volcano plots for ORR on Sub@FeN<sub>4</sub>, Sub@CoN<sub>4</sub>, Sub@NiN<sub>4</sub>, and Sub@CuN<sub>4</sub>.

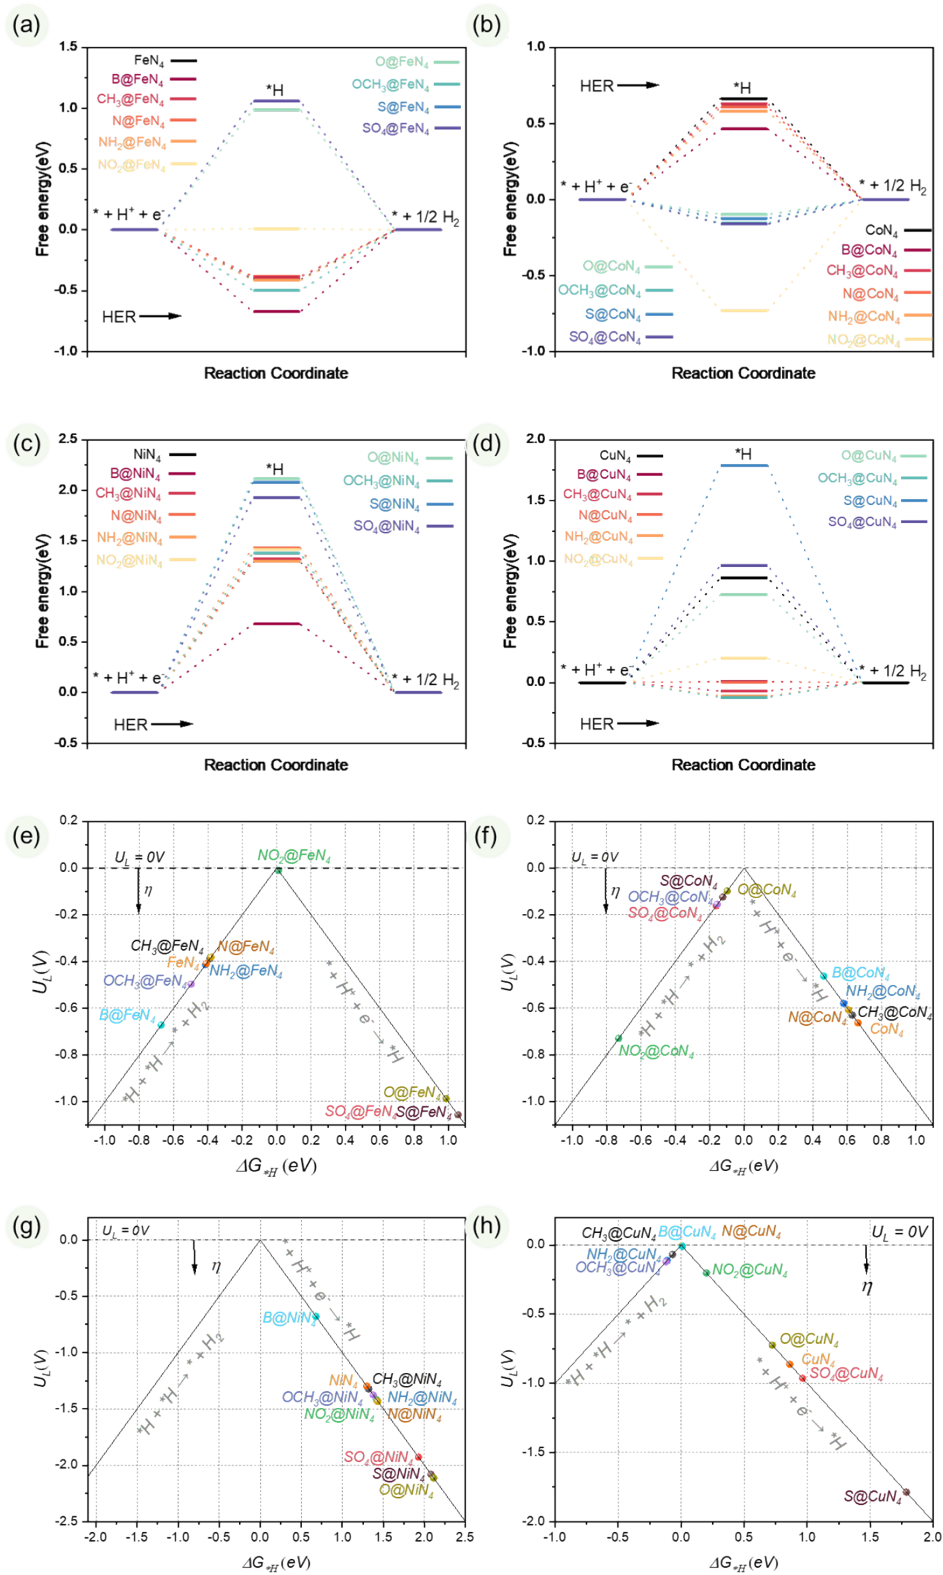

Figure S9. Free energy diagrams for HER on (a)  $Sub@FeN_4$ , (b)  $Sub@CoN_4$ , (c)  $SubNiN_4$ , and (d)  $Sub@CuN_4$  catalysts; Volcano plots for HER on (e)  $Sub@FeN_4$ , (f)  $Sub@CoN_4$ , (g)  $SubNiN_4$ , and (h)  $Sub@CuN_4$  catalysts.

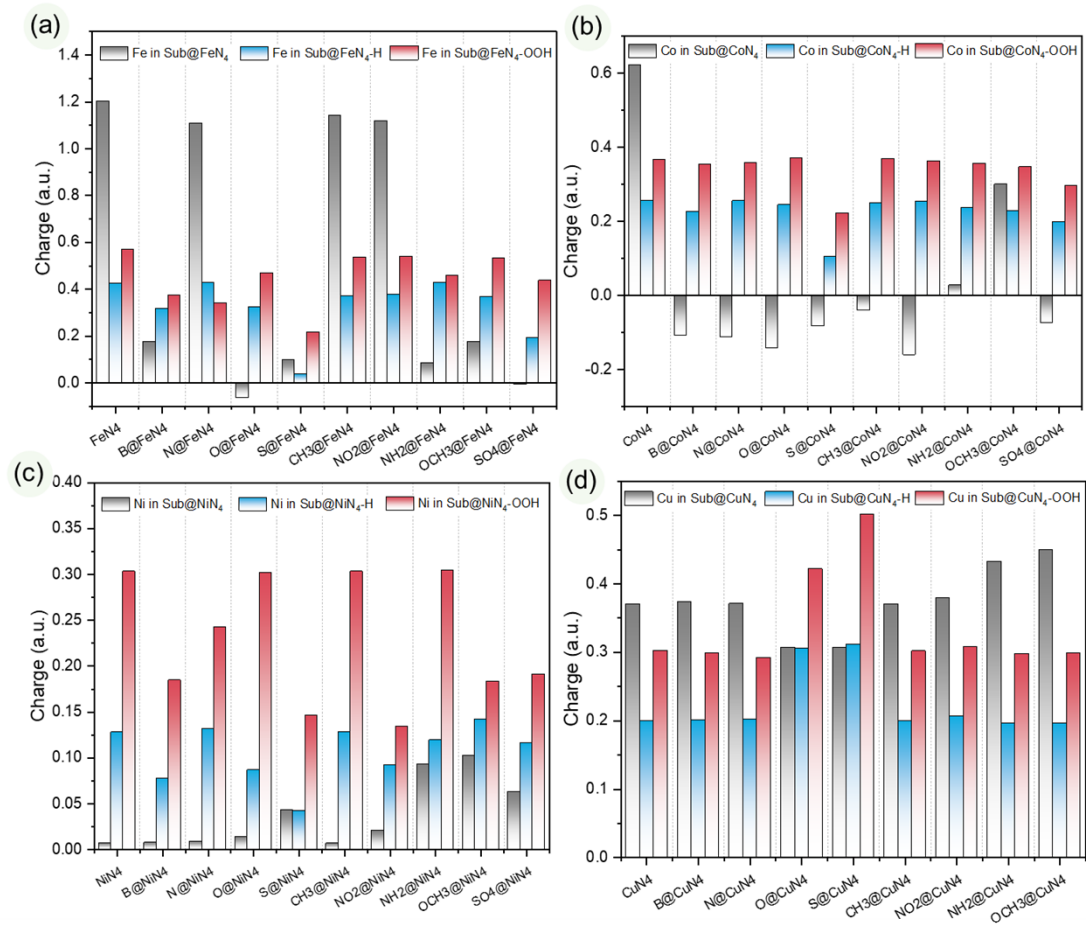

Figure S10. Variation of metal center charge in (a) Sub@FeN<sub>4</sub>, (b) Sub@CoN<sub>4</sub>, (c) Sub@NiN<sub>4</sub>, and (d) Sub@CuN<sub>4</sub> catalysts with different edge-doping groups.



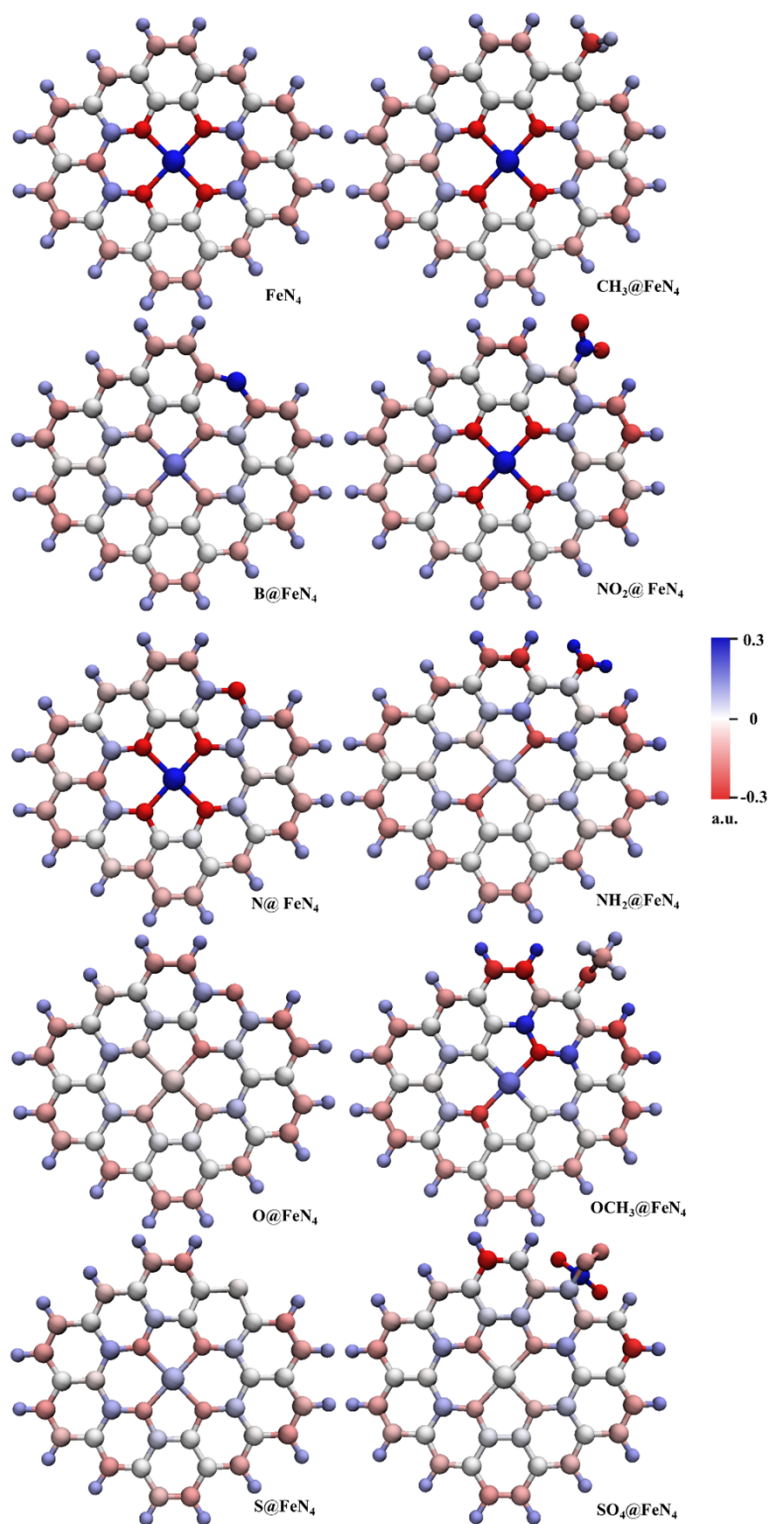

Figure S11. Charge distribution map of Sub@FeN<sub>4</sub> catalyst.

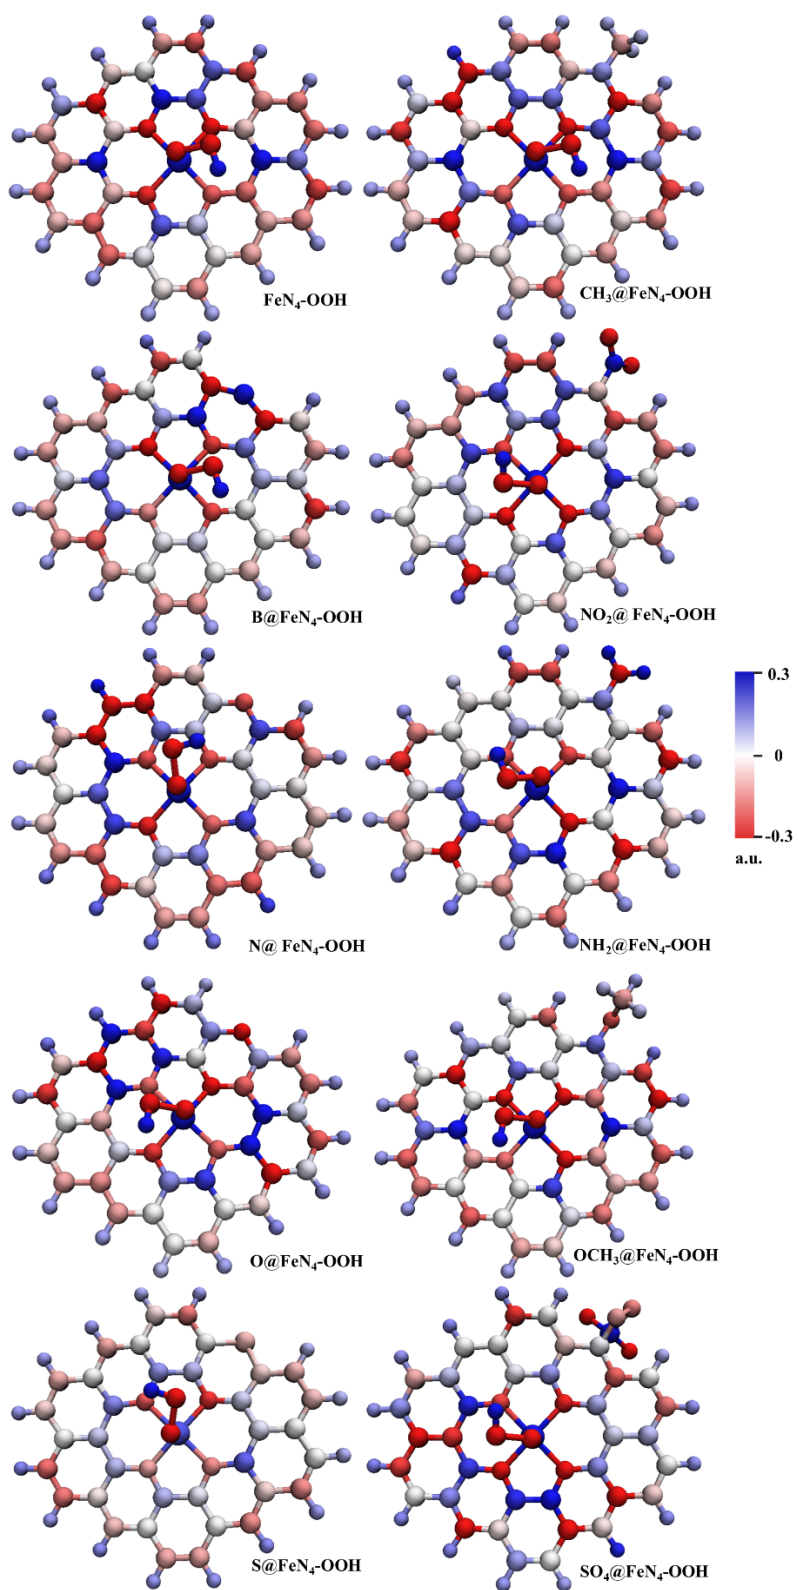

Figure S12. Charge distribution map of Sub@FeN<sub>4</sub> catalyst after \*OOH adsorption.

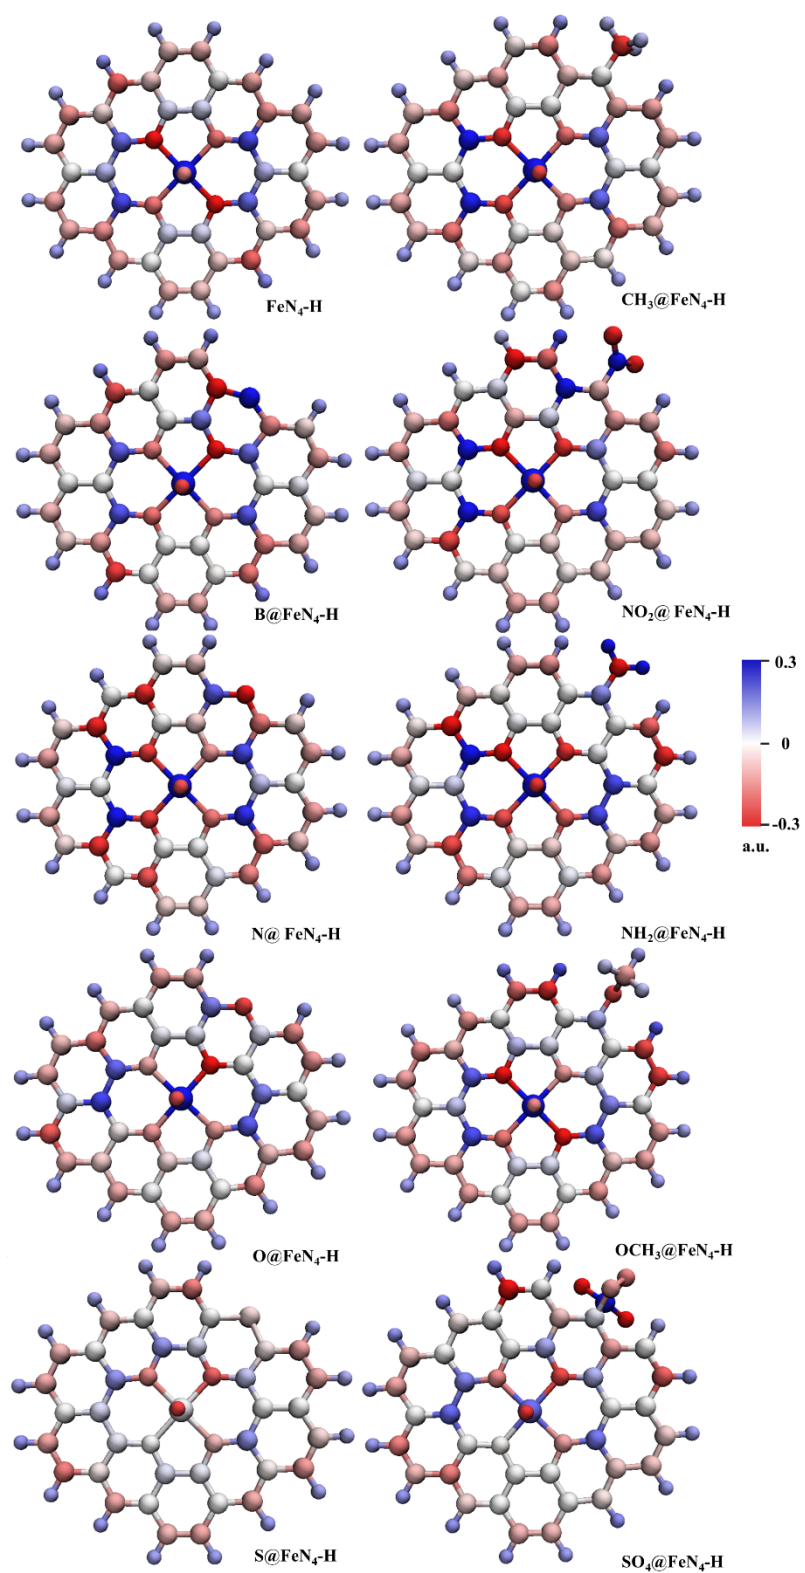

Figure S13. Charge distribution map of Sub@FeN<sub>4</sub> catalyst after \*H adsorption.

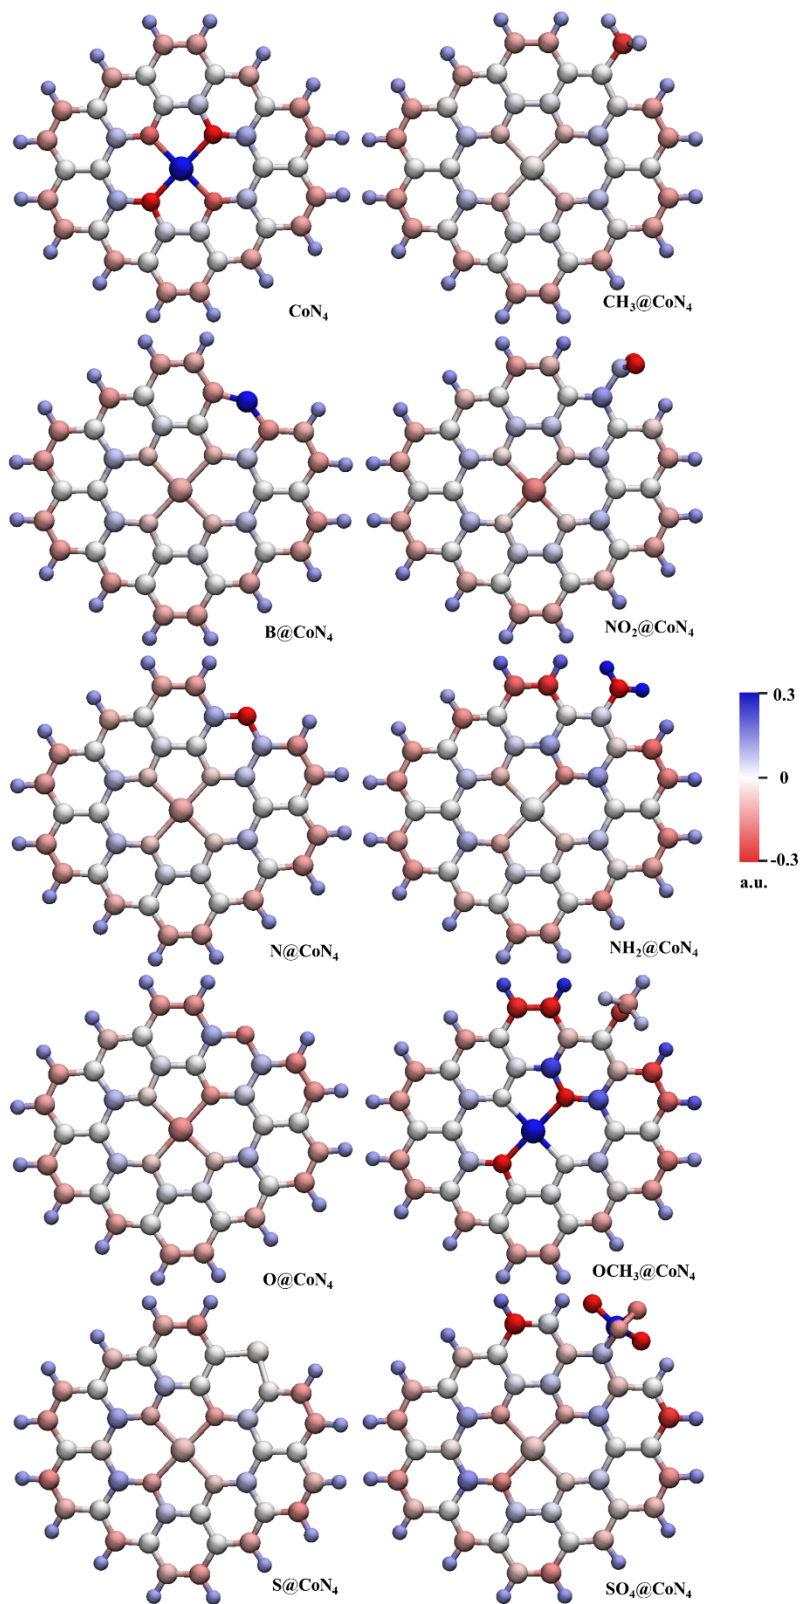

Figure S14. Charge distribution map of Sub@CoN<sub>4</sub> catalyst.

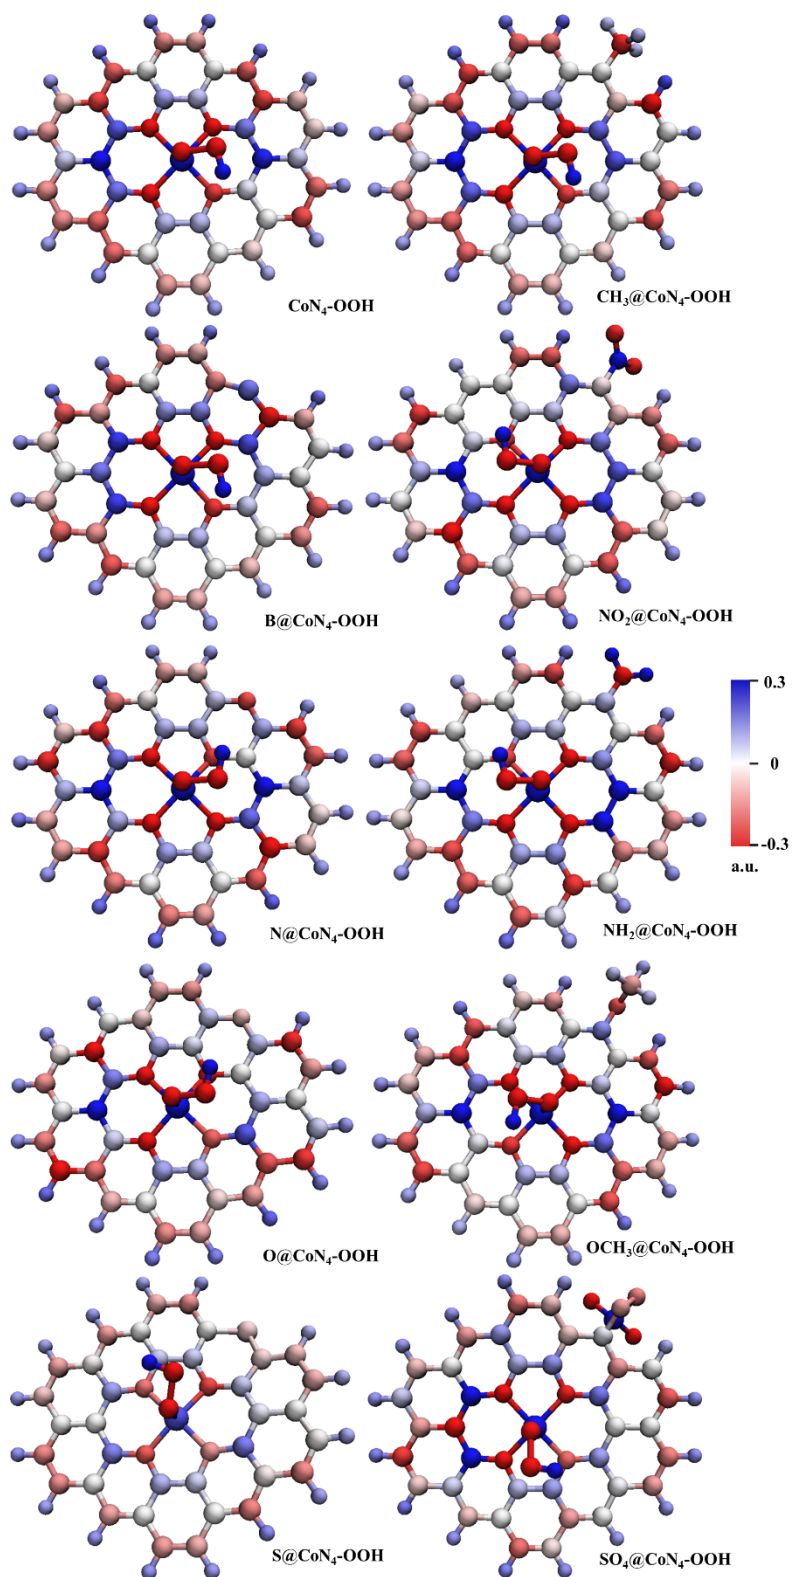

Figure S15. Charge distribution map of Sub@CoN<sub>4</sub> catalyst after \*OOH adsorption.



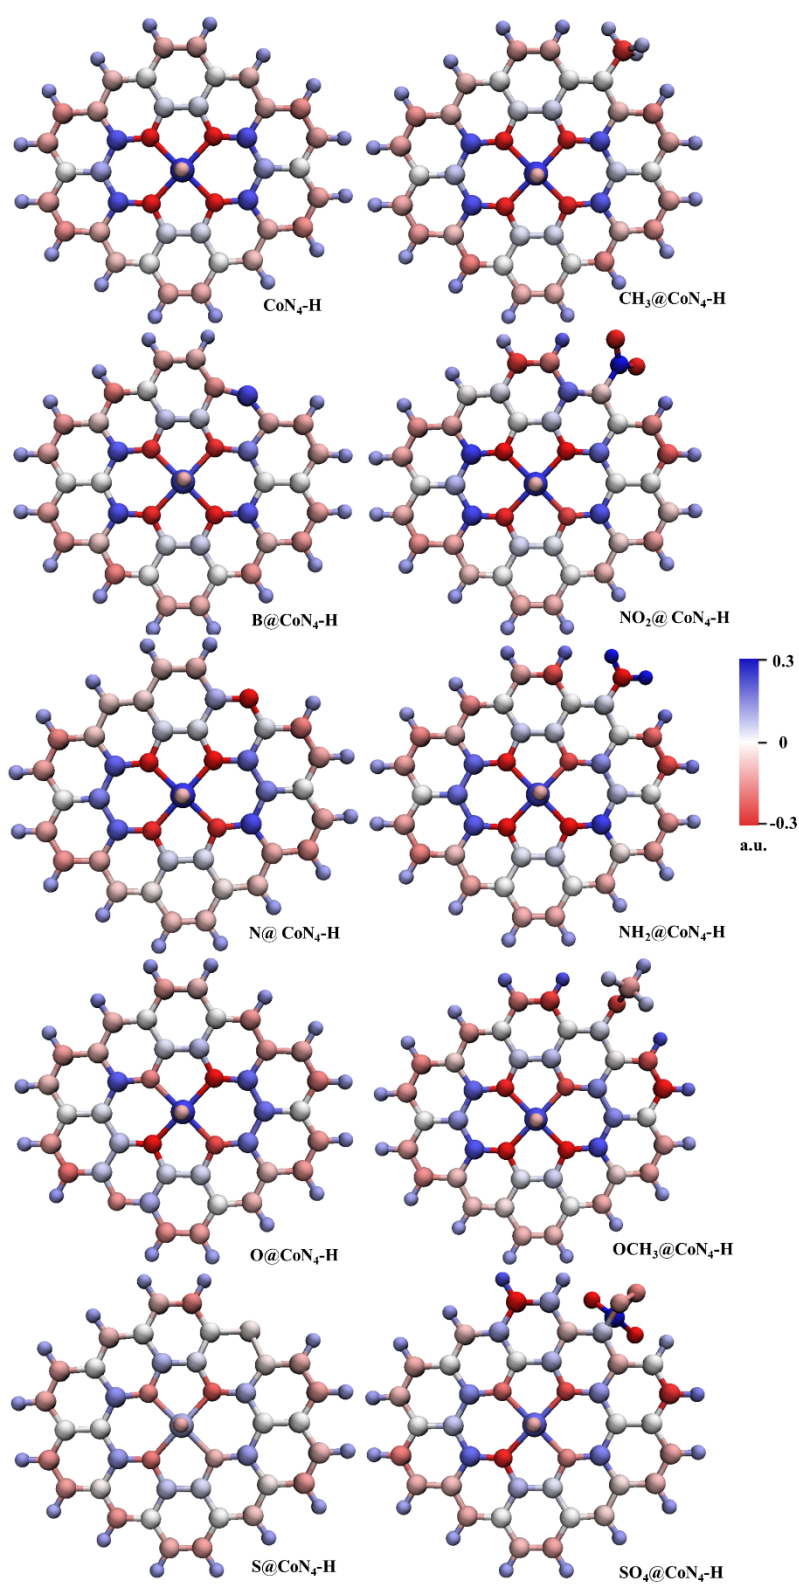

Figure S16. Charge distribution map of Sub@CoN<sub>4</sub> catalyst after \*H adsorption.

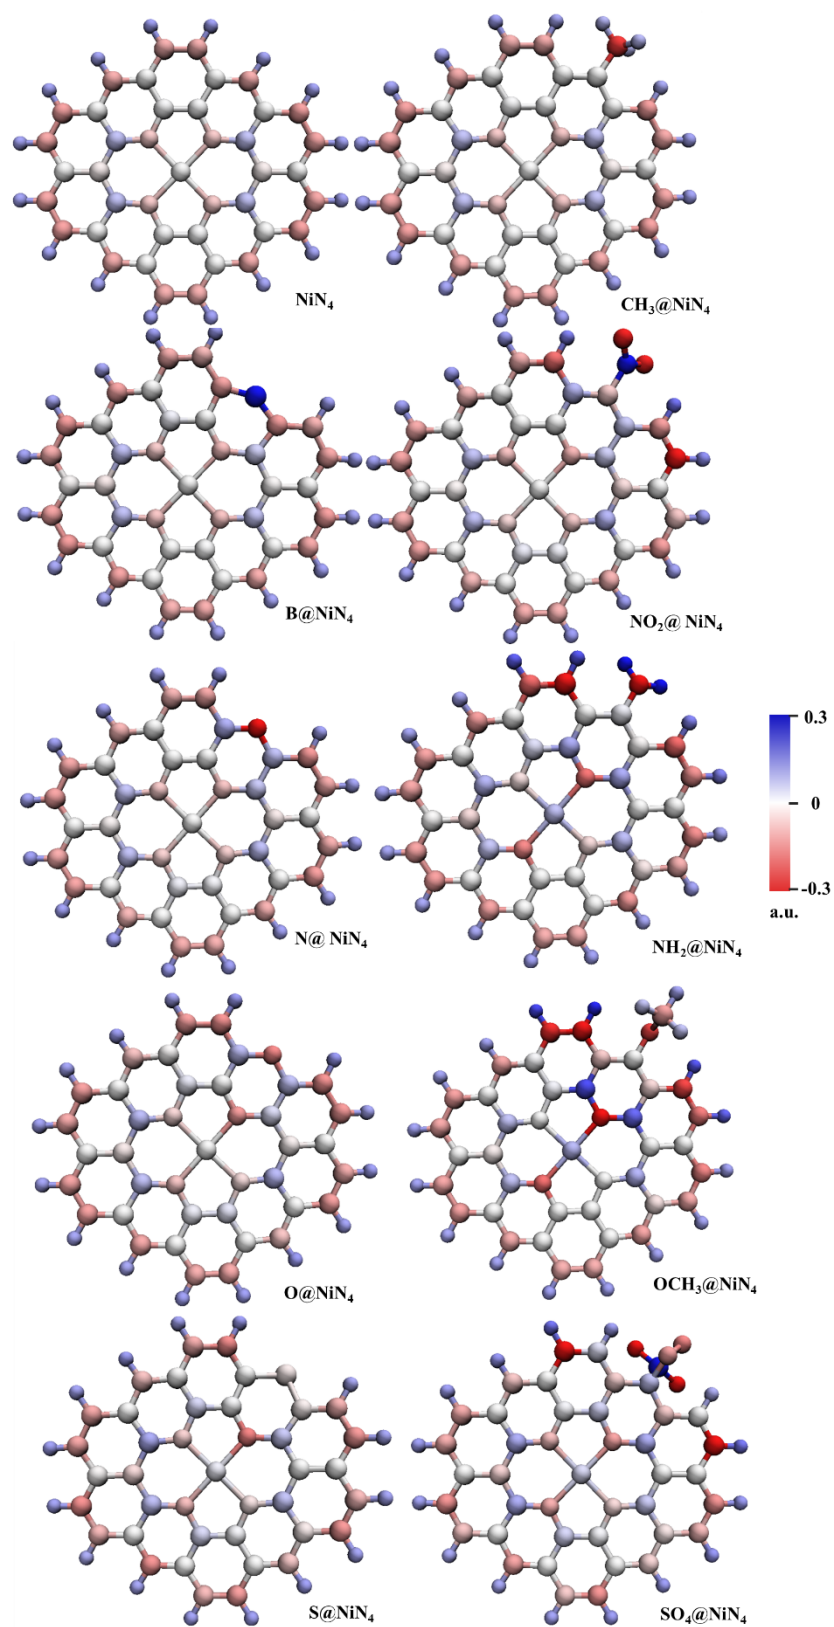

Figure S17. Charge distribution map of Sub@ $\text{NiN}_4$  catalyst.



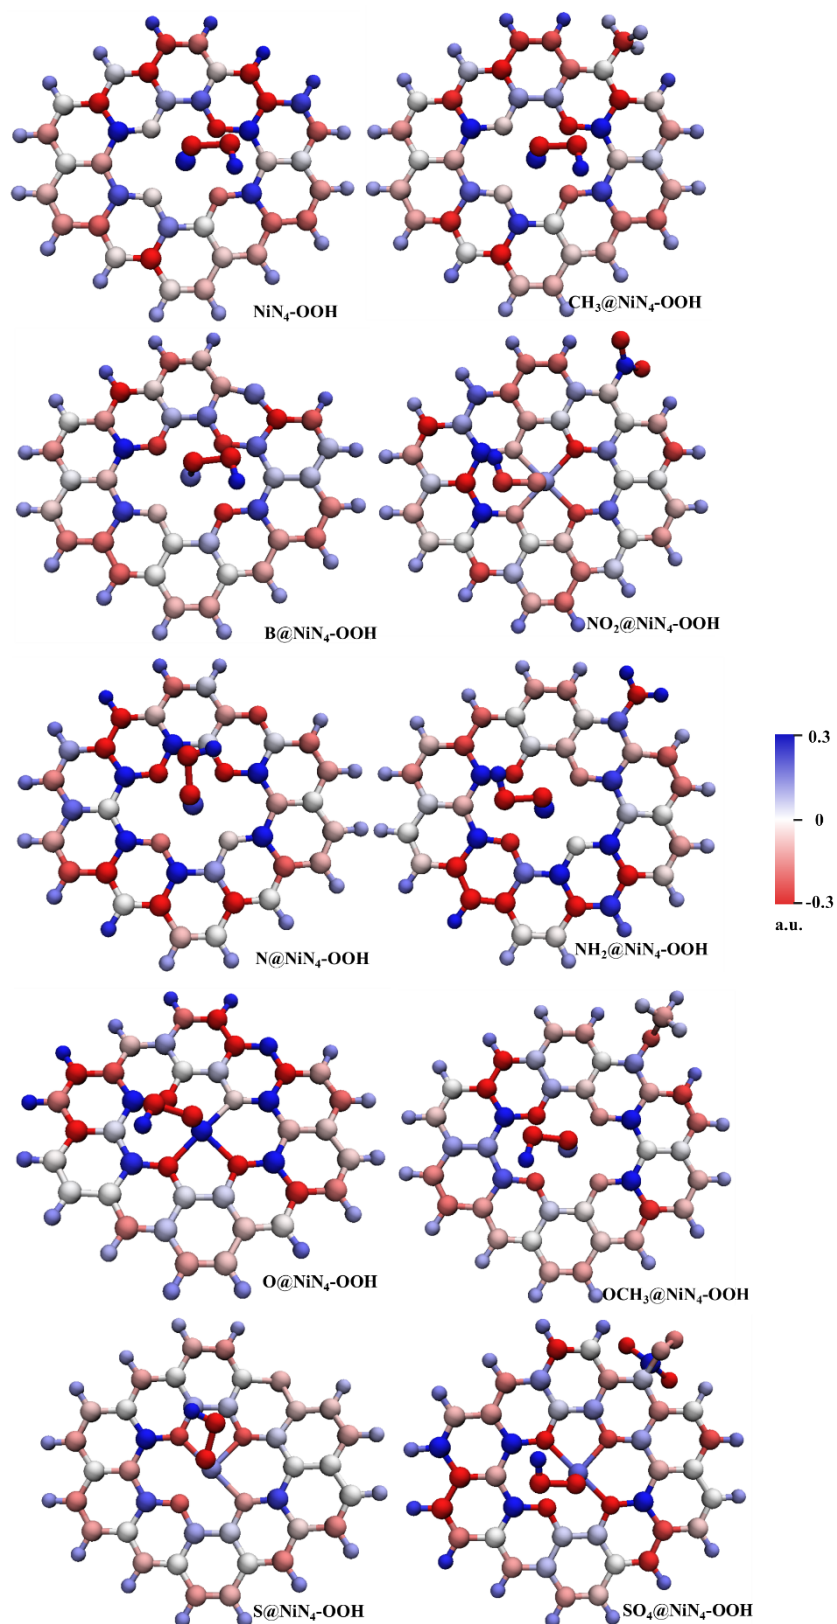

Figure S18. Charge distribution map of Sub@Ni<sub>4</sub> catalyst with \*OOH adsorption.

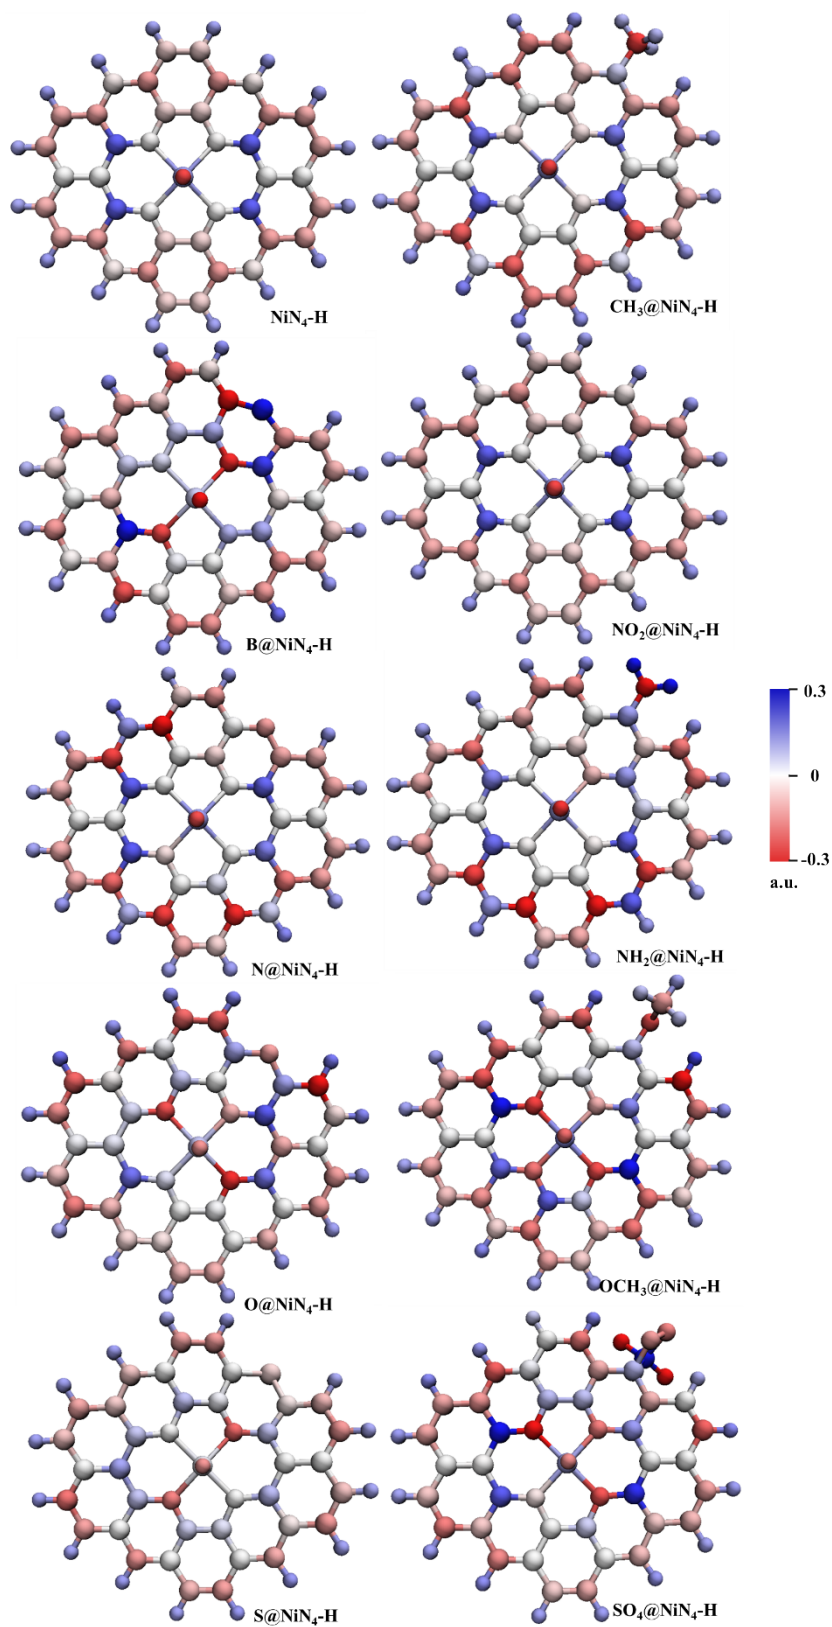

Figure S19. Charge distribution map of Sub@NiN<sub>4</sub> catalyst with \*H adsorption.

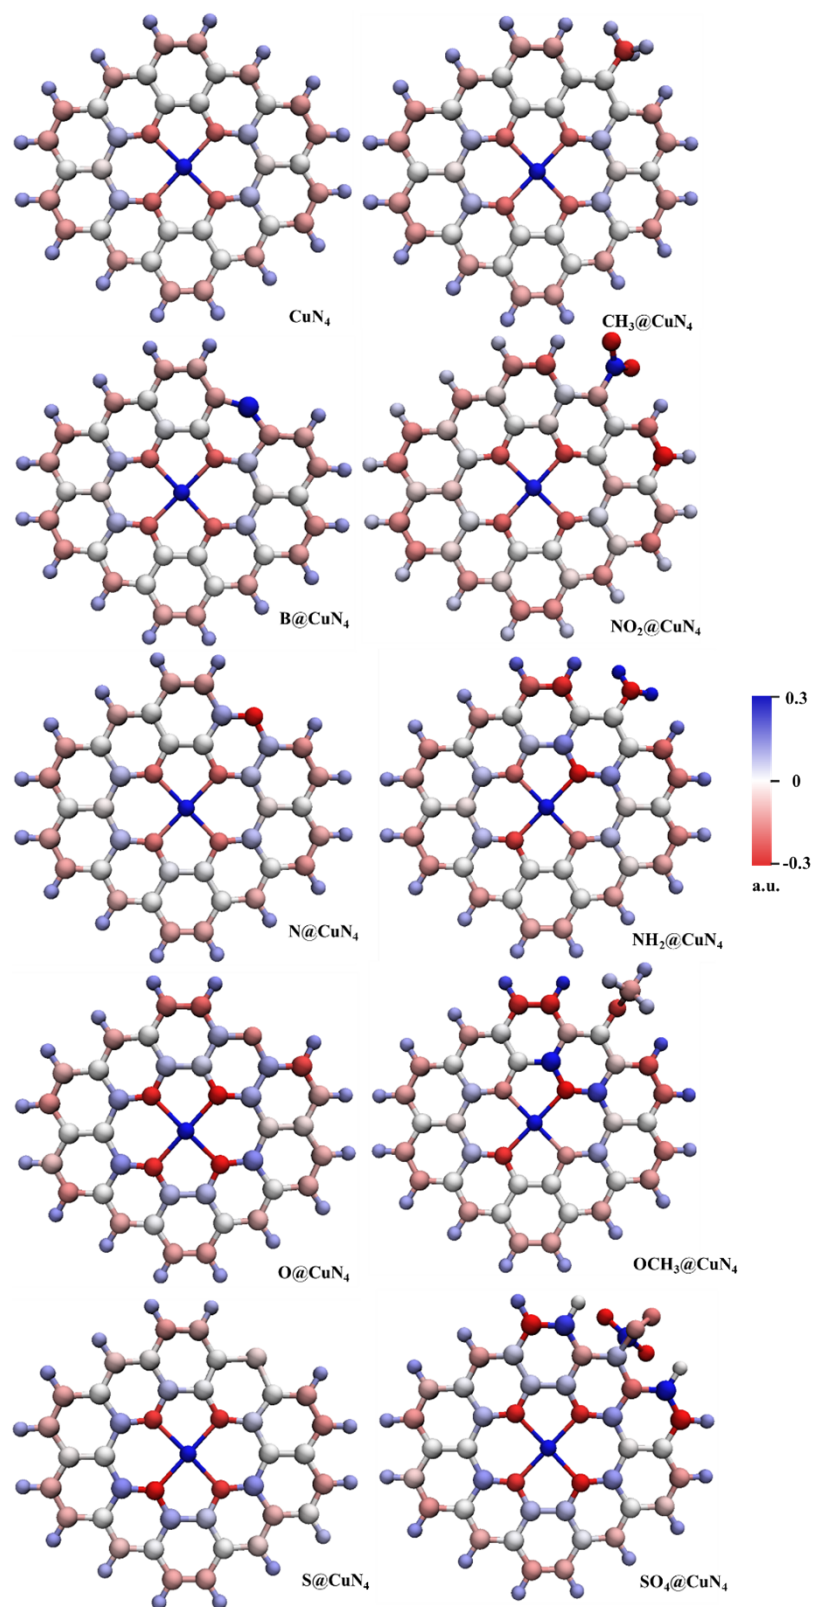

Figure S20. Charge distribution map of Sub@CuN<sub>4</sub> catalyst.

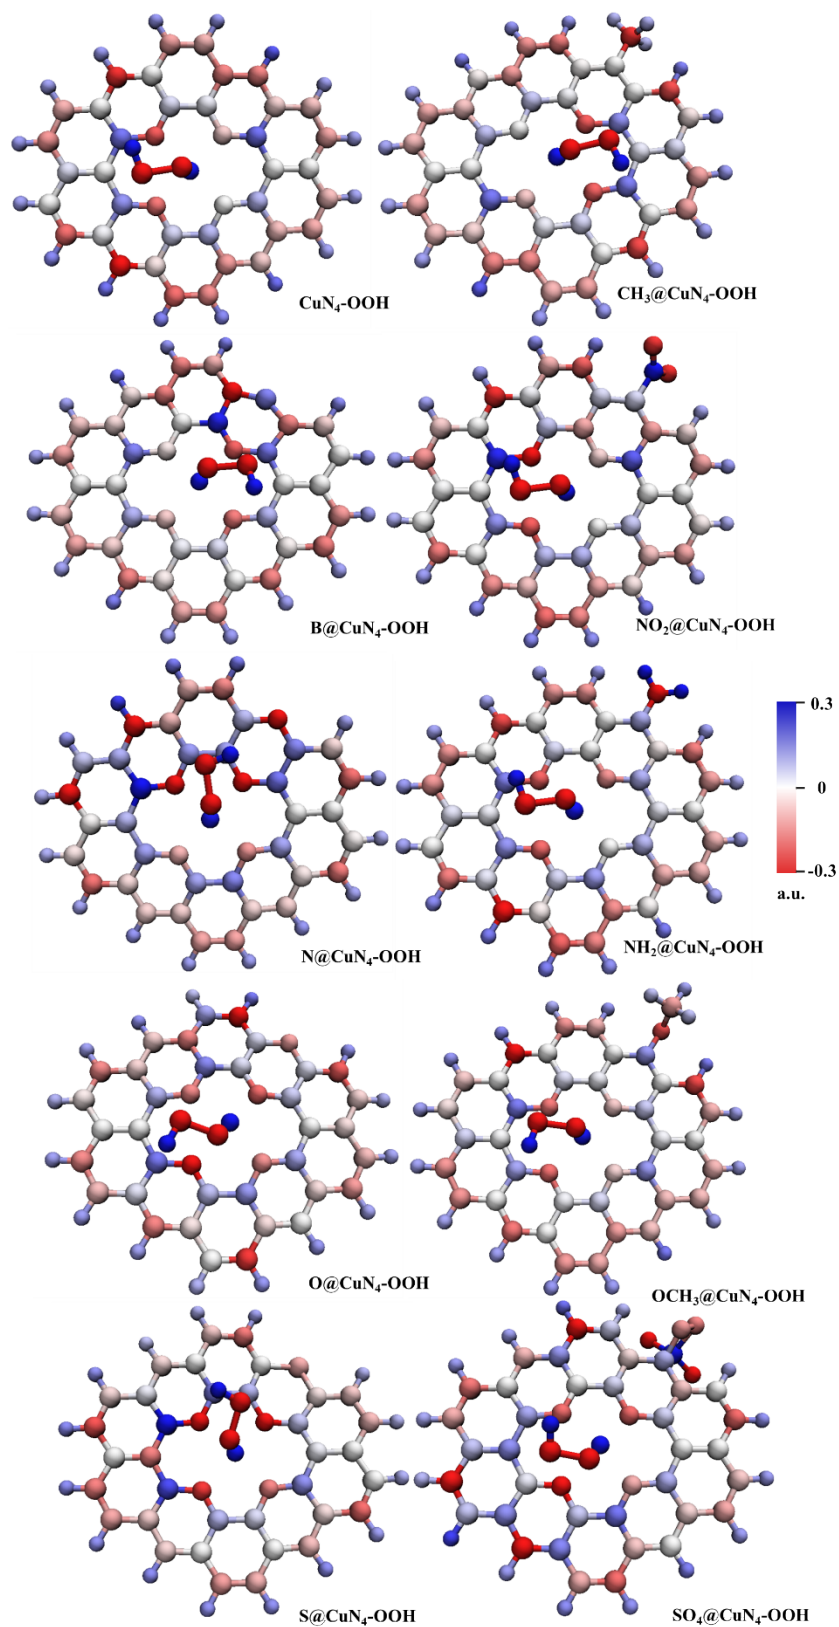

Figure S21. Charge distribution map of Sub@CuN<sub>4</sub> catalyst with \*OOH adsorption.

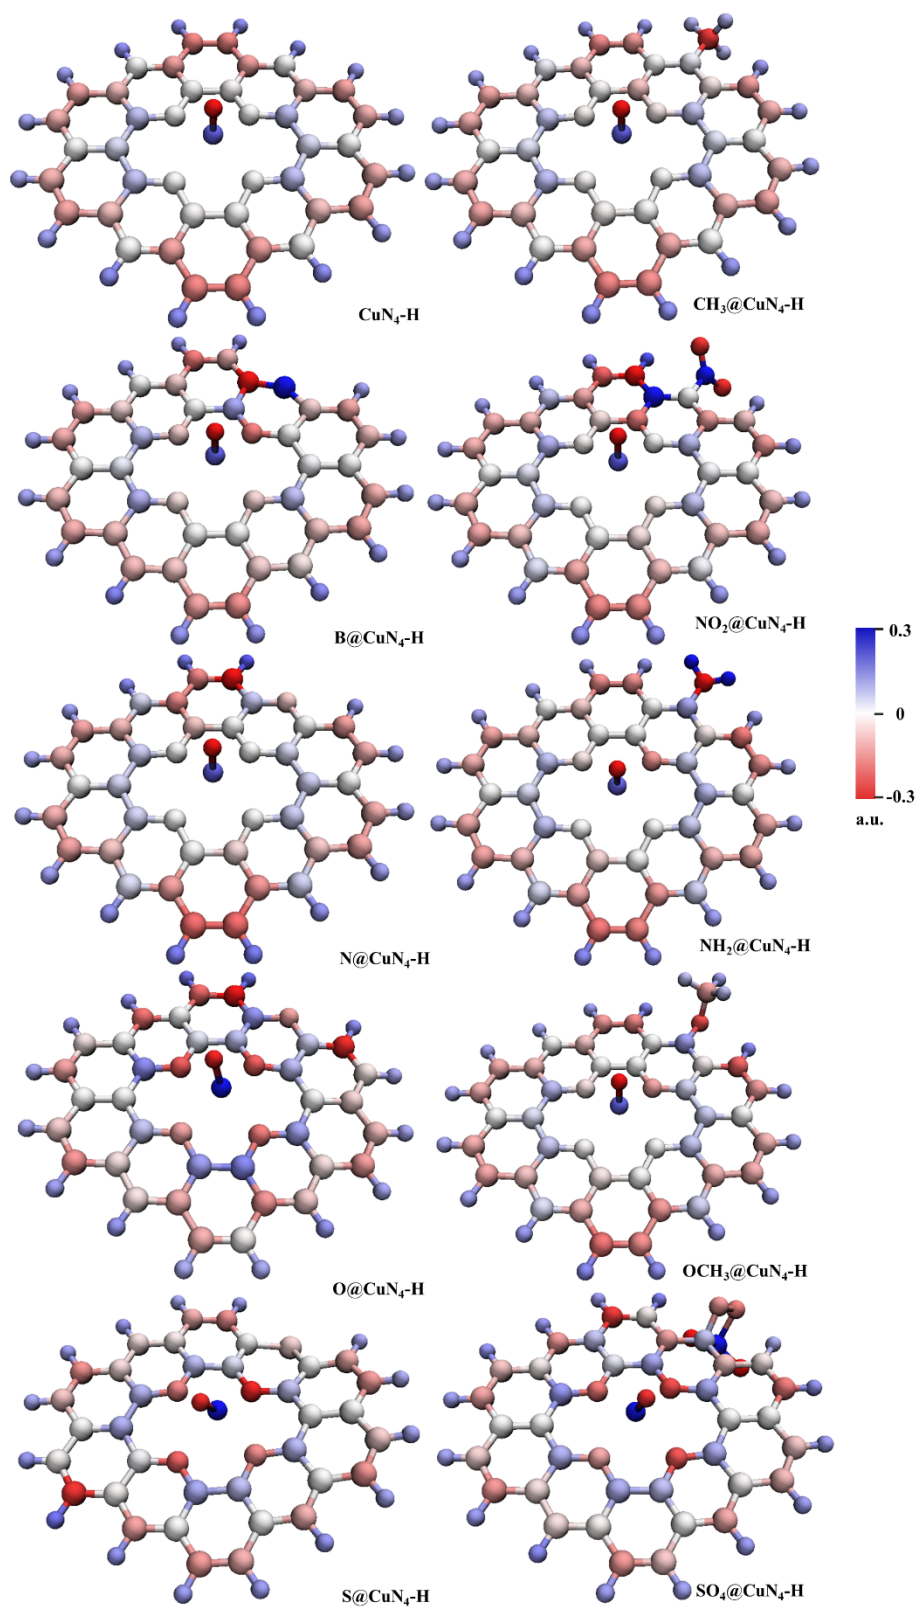

Figure S22. Charge distribution map of Sub@CuN<sub>4</sub> catalyst with \*H adsorption.



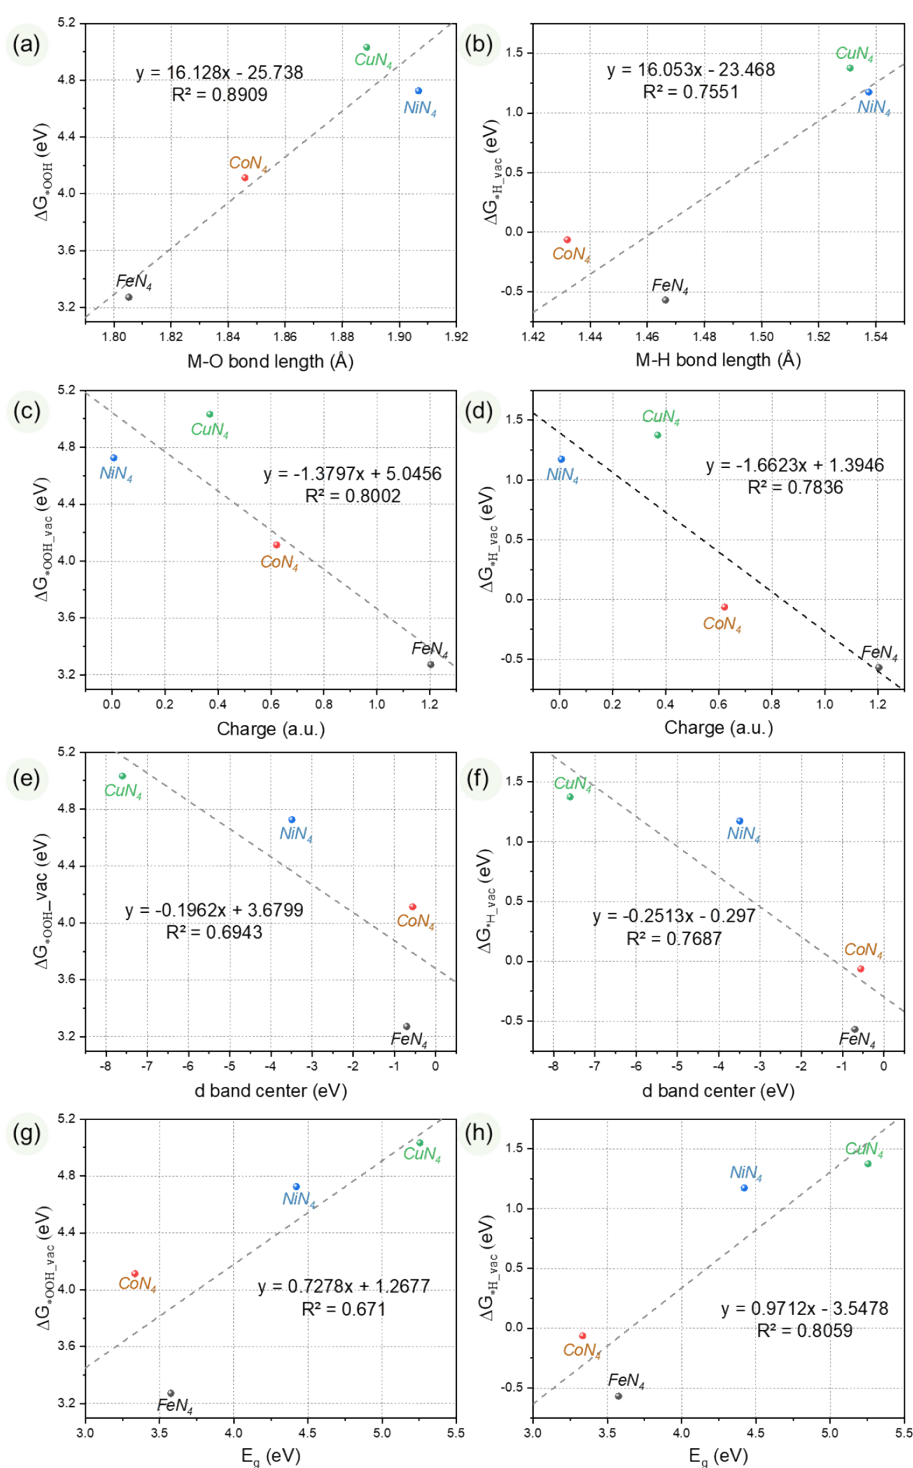

Figure S23. Structure-activity relationships in  $MN_4$ . Correlation of  $*OOH$  adsorption free energy with (a) M-O bond length, (b) metal center charge, (c) d-band center, and (d) fundamental gap; correlation of  $*H$  adsorption free energy with (e) M-H bond length, (f) metal center charge, (g) d-band center, and (h) fundamental gap.

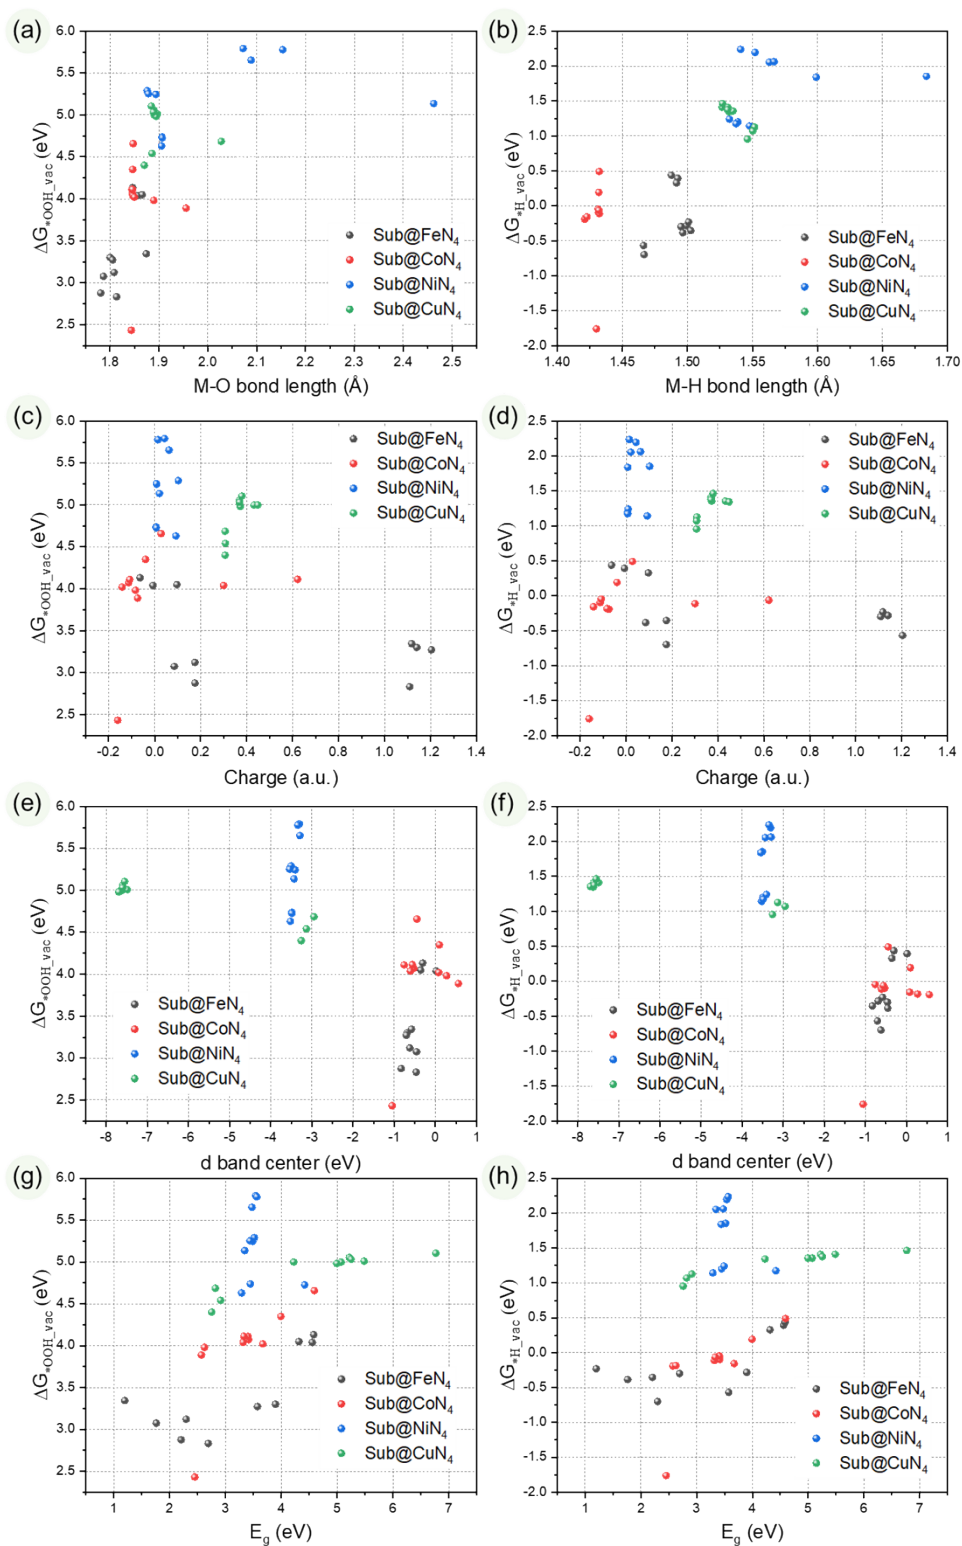

Figure S24. Structure-activity relationships in Sub@MN<sub>4</sub>. Correlation of \*OOH adsorption free energy with (a) M-O bond length, (b) metal center charge, (c) d-band center, and (d) fundamental gap; correlation of \*H adsorption free energy with (e) M-H bond length, (f) metal center charge, (g) d-band center, and (h) fundamental gap.



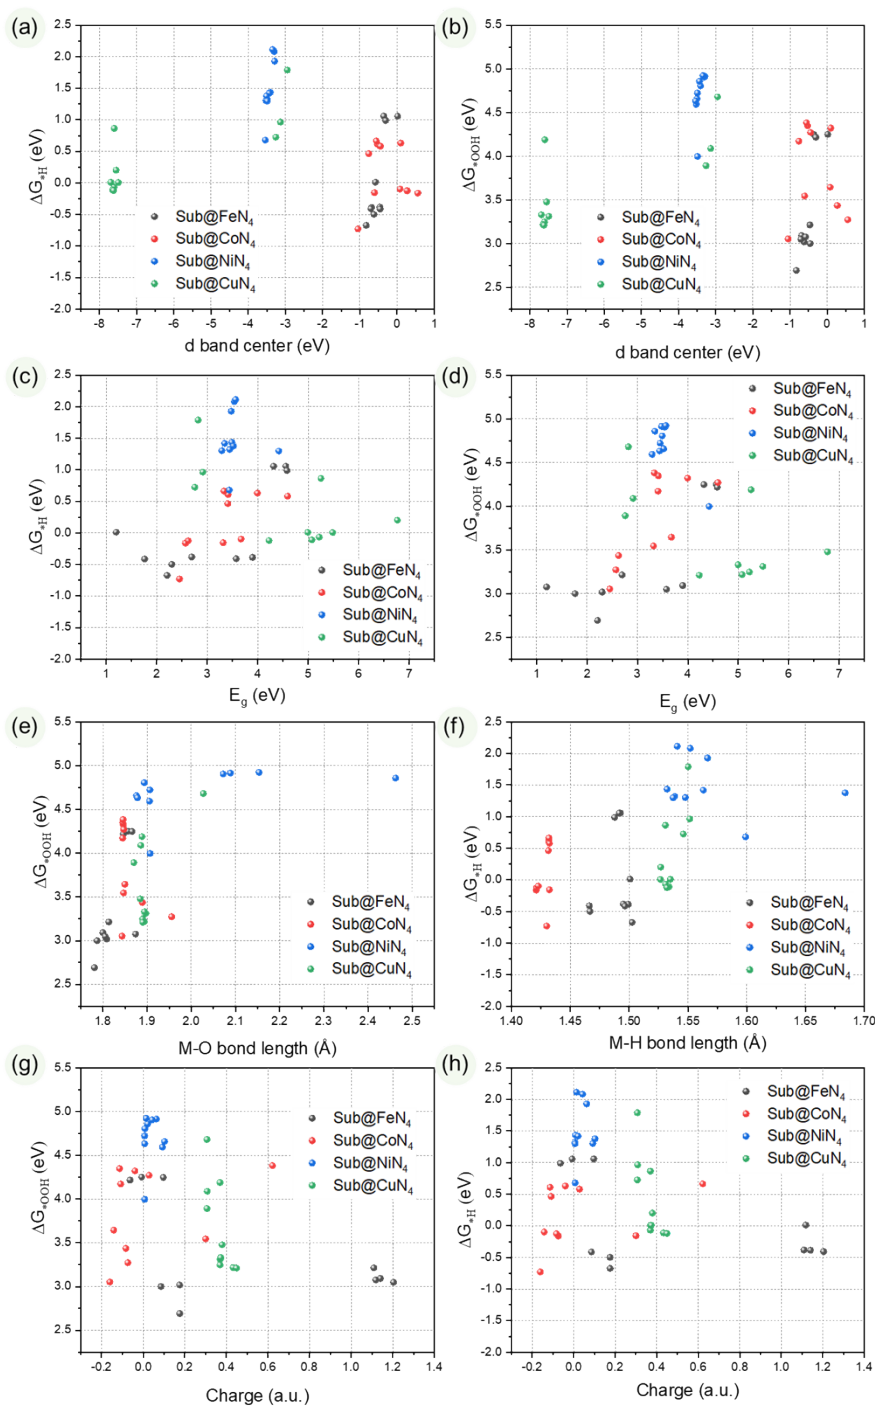

Figure S25. Structure-activity relationships in  $\text{Sub@MN}_4$  considering the implicit solvent model. Correlation of  $\text{*OOH}$  adsorption free energy with (a) M-O bond length, (b) metal center charge, (c) d-band center, and (d) fundamental gap; correlation of  $\text{*H}$  adsorption free energy with (e) M-H bond length, (f) metal center charge, (g) d-band center, and (h) fundamental gap.

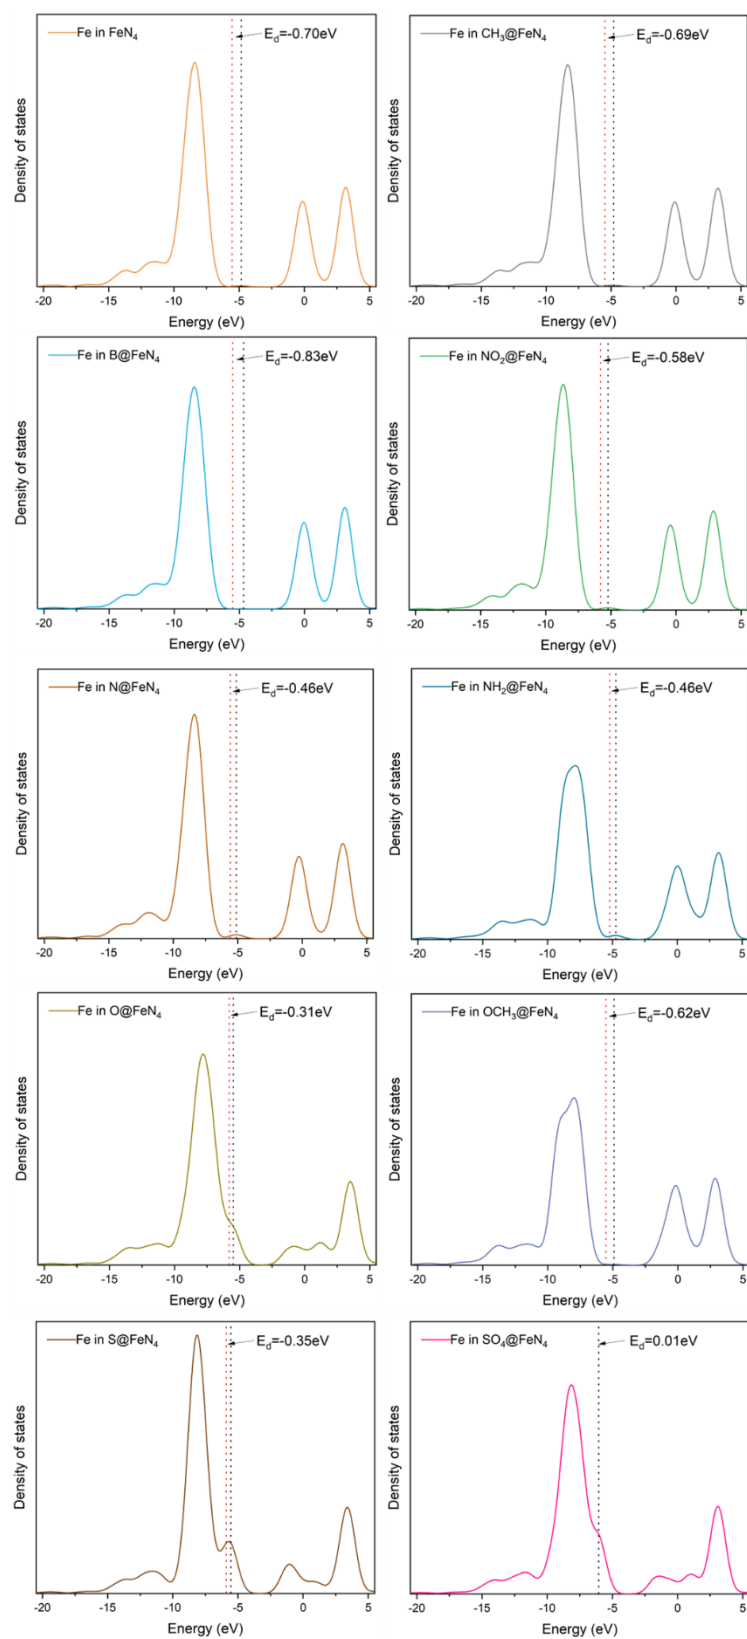

Figure S26. d-band center of Fe in Sub@FeN<sub>4</sub> catalyst.

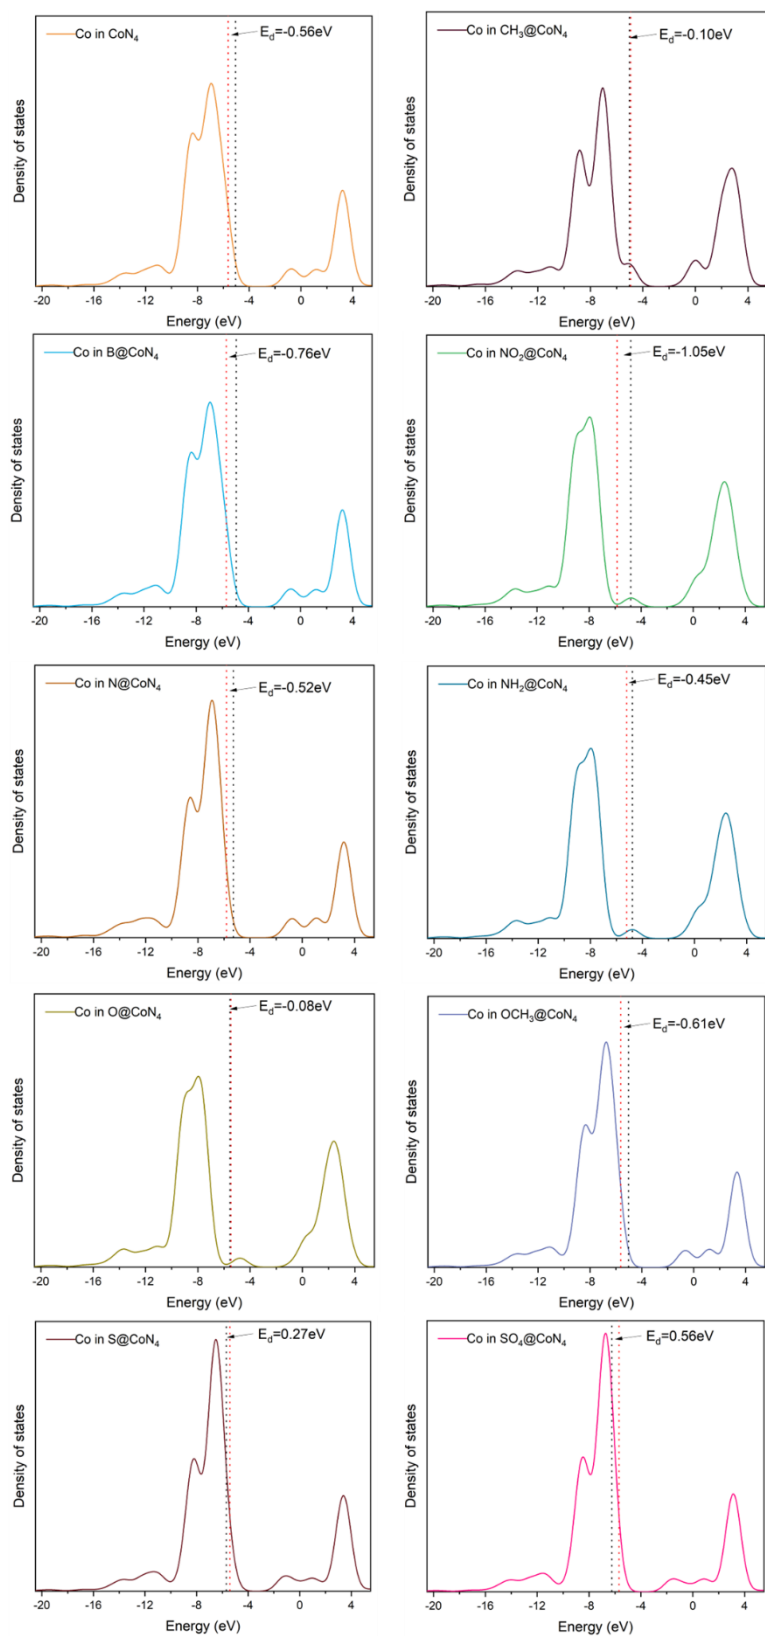

Figure S27. d-band center of Co in Sub@CoN<sub>4</sub> catalyst.

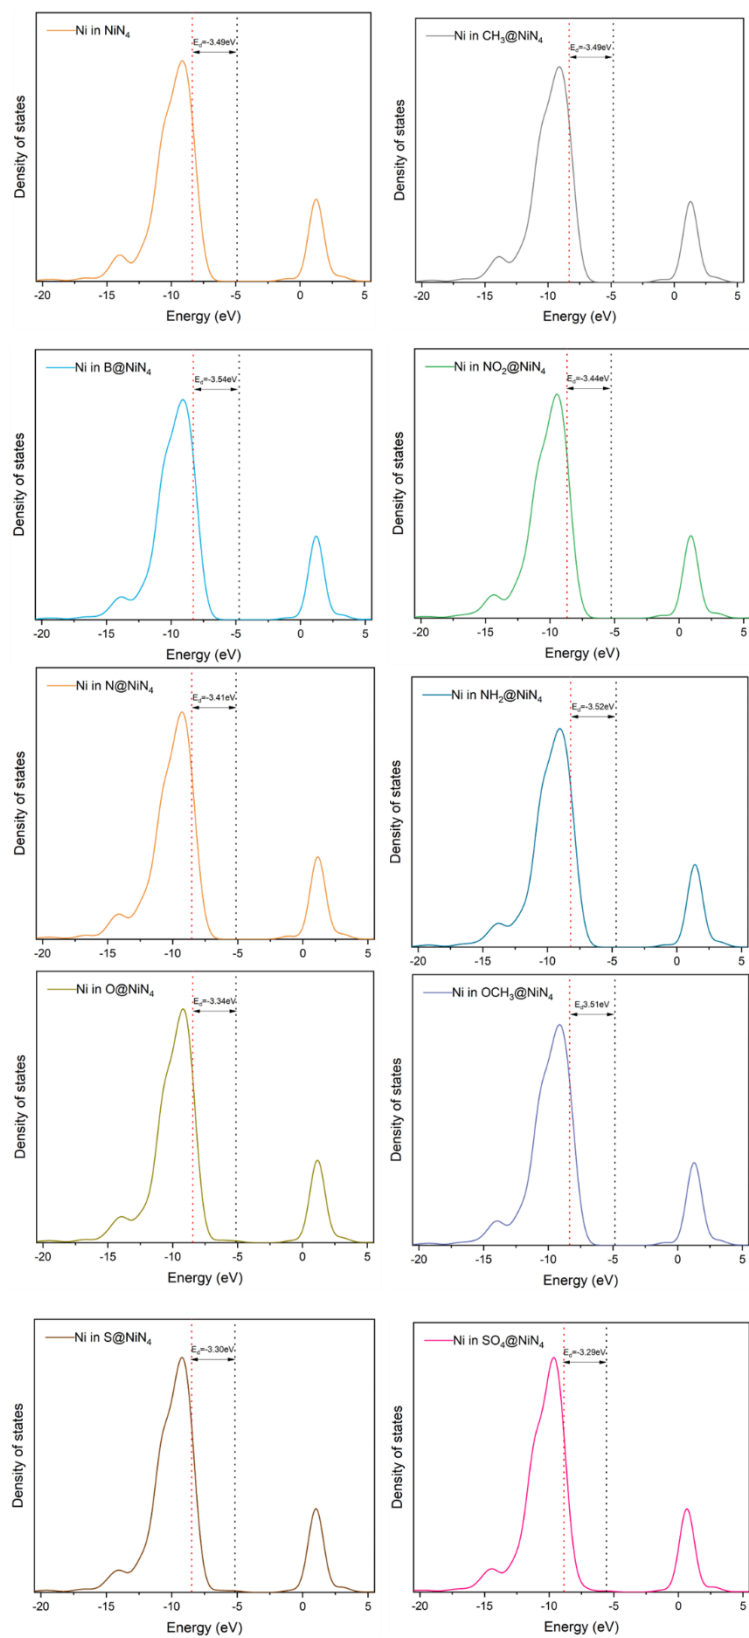

Figure S28. d-band center of Ni in Sub@Ni<sub>4</sub> catalyst.

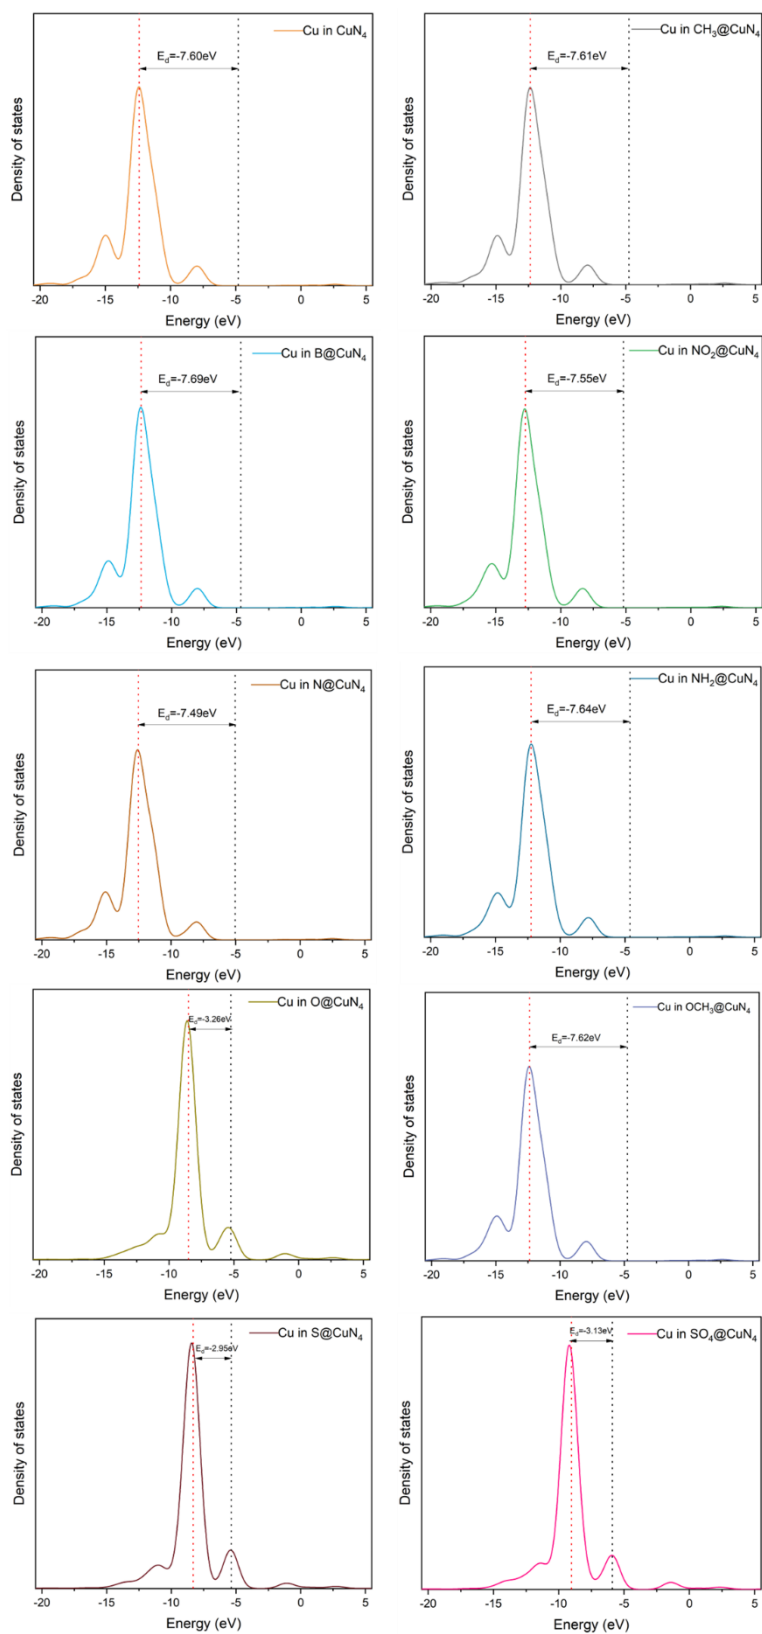

Figure S29. d-band center of Cu in Sub@CuN<sub>4</sub> catalyst.

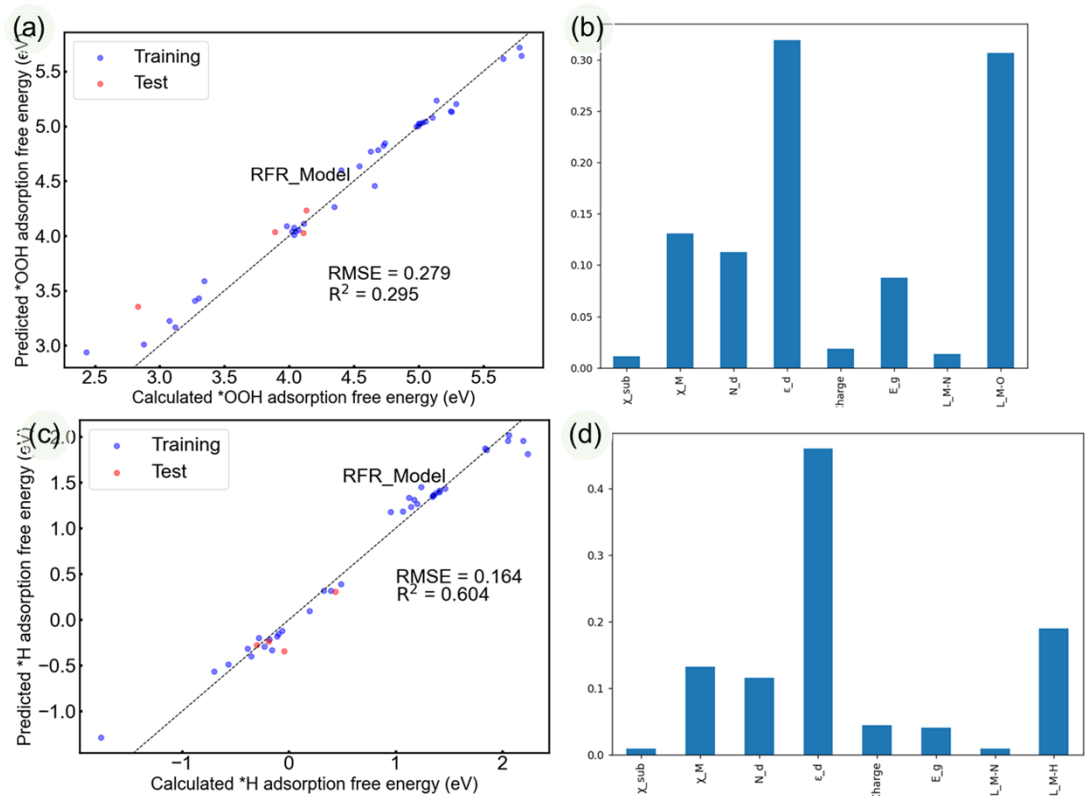

Figure S30. Comparison of (a) \*OOH adsorption free energy and (c) \*H adsorption free energy calculated from the Random Forest Regression (RFR) model with DFT (Density Functional Theory) computed values. Importance analysis of each feature for (b) \*OOH adsorption free energy and (d) \*H adsorption free energy.

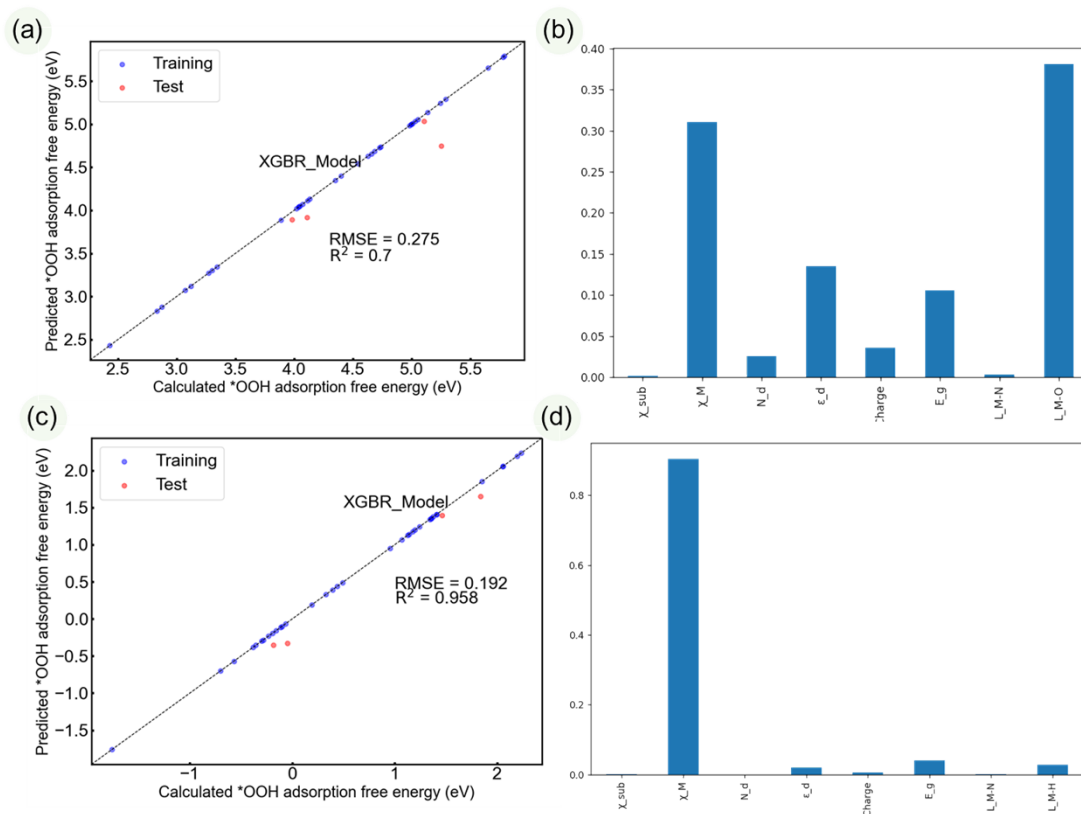

Figure S31. Comparison of (a) \*OOH adsorption free energy and (c) \*H adsorption free energy calculated from the XGBoost Regression (XGBR) model with DFT (Density Functional Theory) computed values. Importance analysis of each feature for (b) \*OOH adsorption free energy and (d) \*H adsorption free energy.



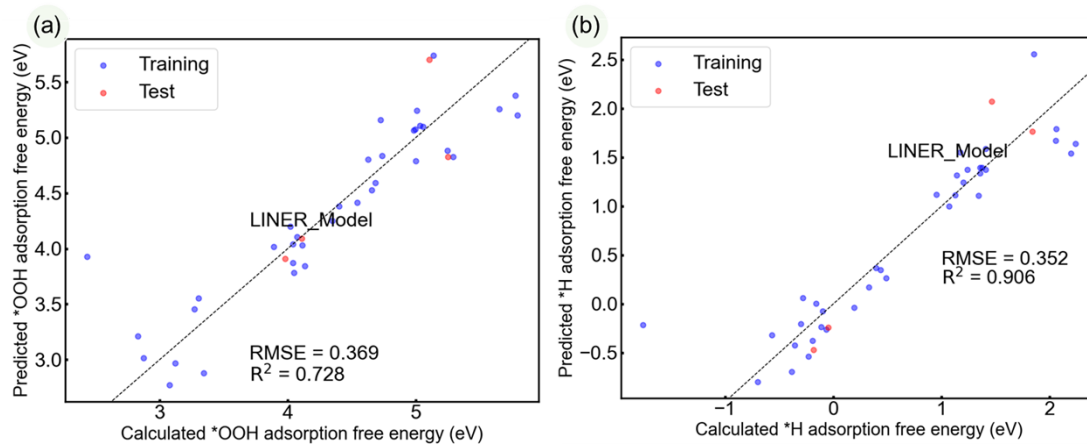

Figure S32. Comparison of (a) \*OOH adsorption free energy and (b) \*H adsorption free energy calculated from the LINER model with DFT (Density Functional Theory) computed values.

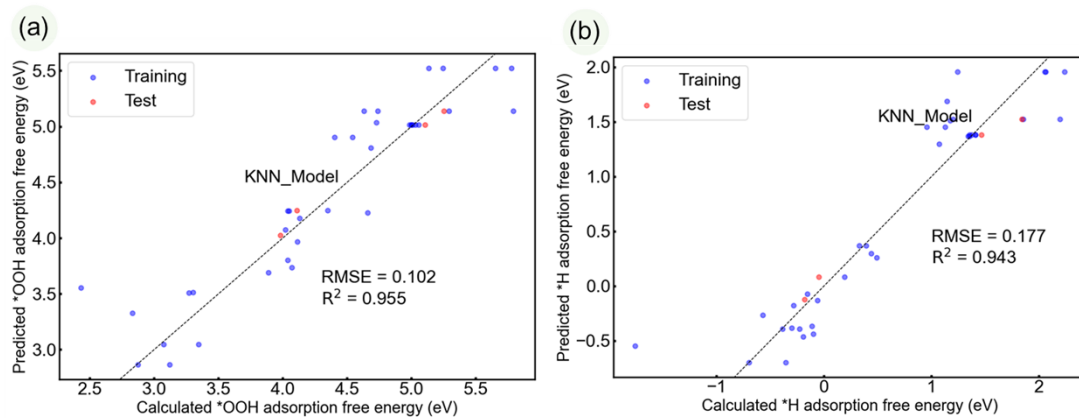

Figure S33. Comparison of (a)  $^*OOH$  adsorption free energy and (b)  $^*H$  adsorption free energy calculated from the KNN (K-Nearest Neighbors) model with DFT (Density Functional Theory) computed values.

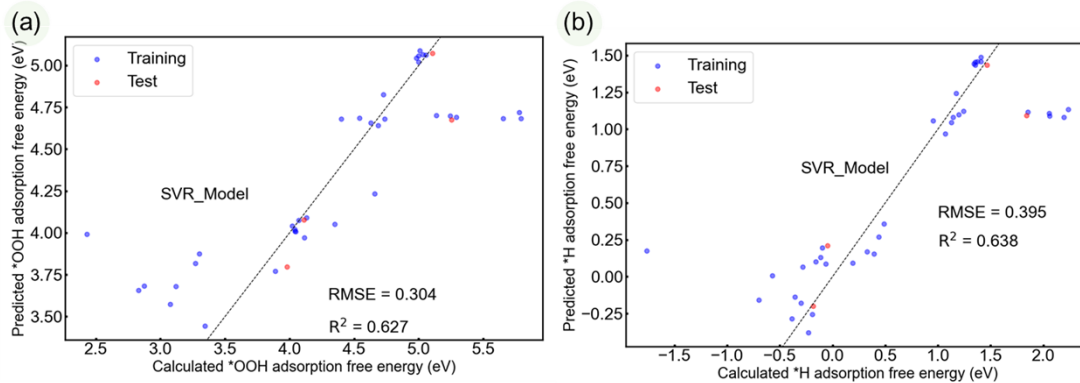

Figure S34. Comparison of (a)  $^*OOH$  adsorption free energy and (b)  $^*H$  adsorption free energy calculated from the SVR (Support Vector Regression) model with DFT (Density Functional Theory) computed values.

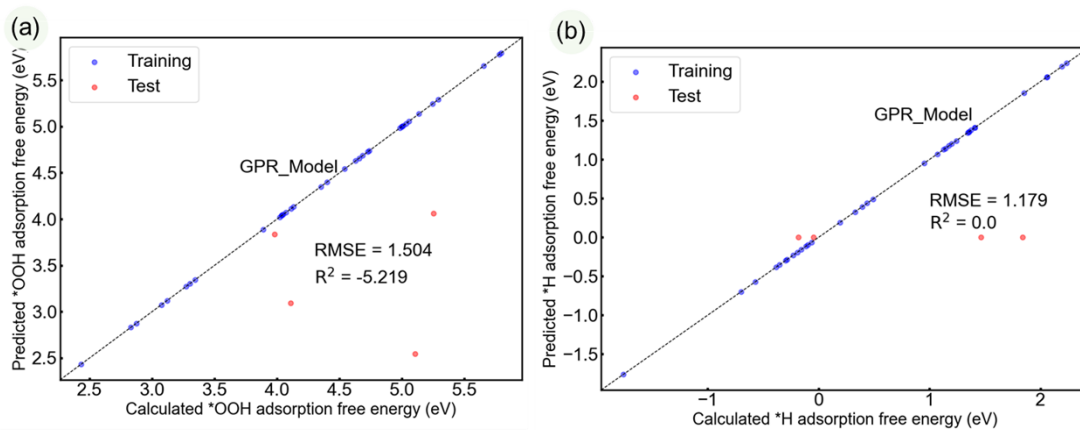

Figure S35. Comparison of (a)  $^*H$  adsorption free energy and (b)  $^*OOH$  adsorption free energy calculated from the GPR (Gaussian Process Regression with Regularization) model with DFT (Density Functional Theory) computed values.

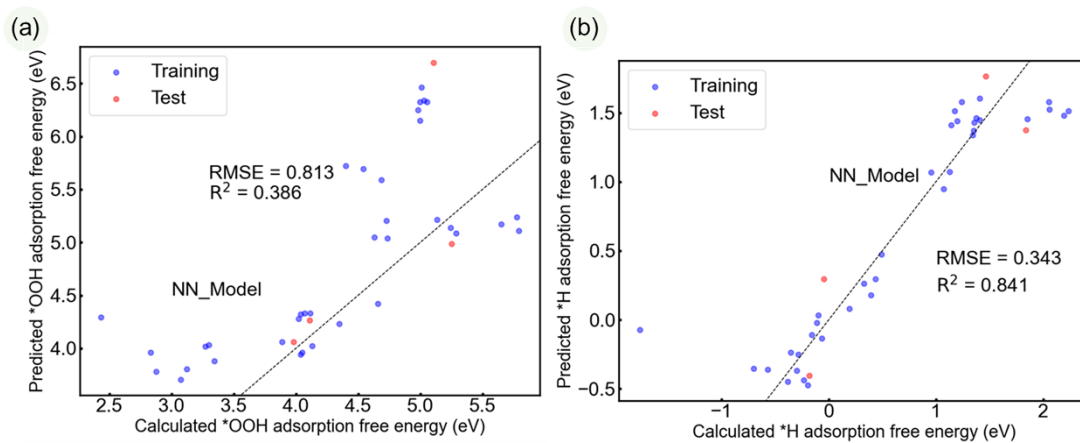

Figure S36. Comparison of (a)  $^*H$  adsorption free energy and (b)  $^*OOH$  adsorption free energy calculated from the NN (Neural Network) model with DFT (Density Functional Theory) computed values.

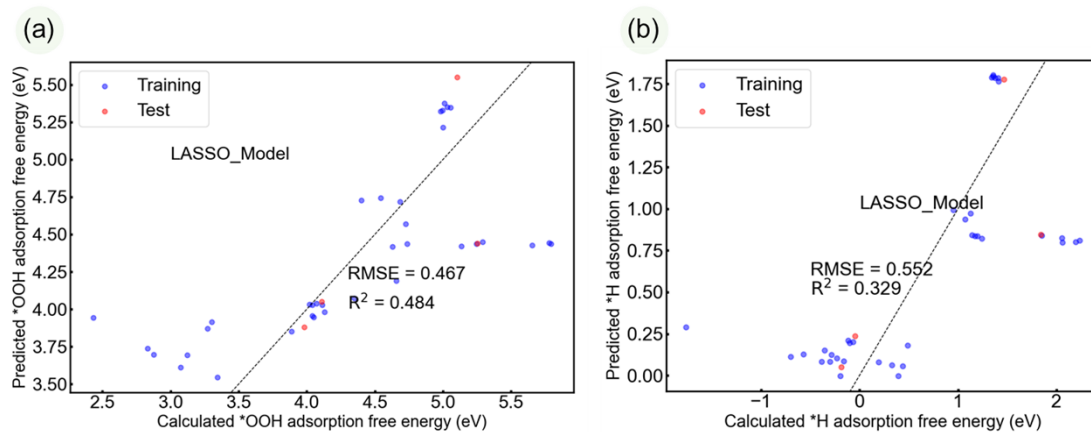

Figure S37. Comparison of (a) \*H adsorption free energy and (b) \*OOH adsorption free energy calculated from the LASSO model with DFT (Density Functional Theory) computed values.

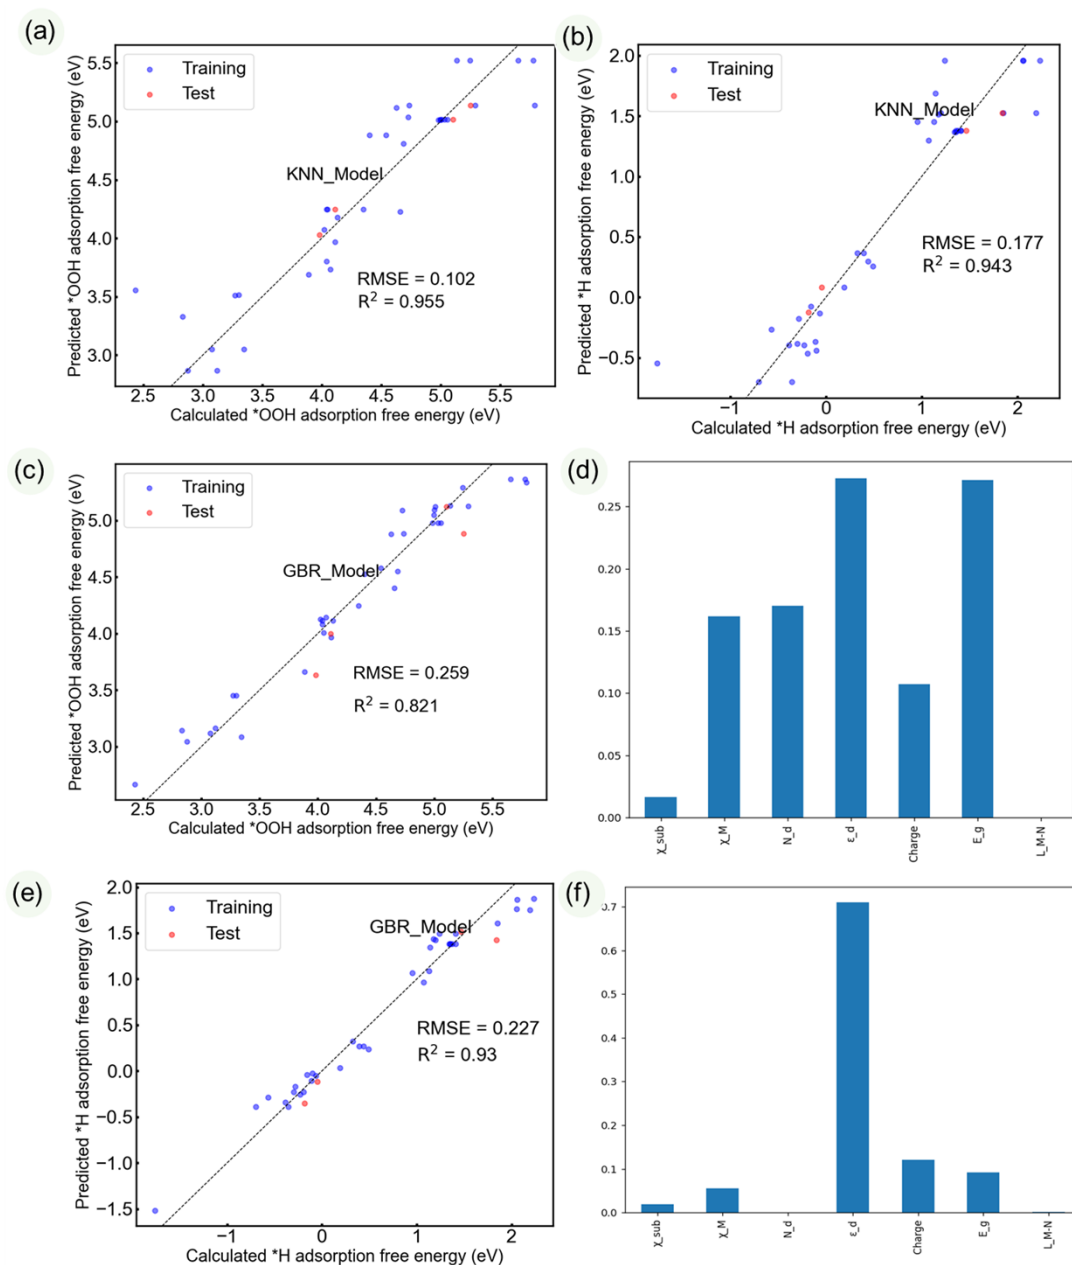

Figure S38. Comparison of (a) \*OOH adsorption free energy and (b) \*H adsorption free energy calculated from the KNN model with DFT (Density Functional Theory) computed values, removing the M-O/M-H lengths as a descriptor. Comparison of (c) \*OOH adsorption free energy and (e) \*H adsorption free energy calculated from the GBR model with DFT (Density Functional Theory) computed values and importance analysis of each feature for (d) \*OOH adsorption free energy and (f) \*H adsorption free energy, removing the M-O/M-H lengths as a descriptor.



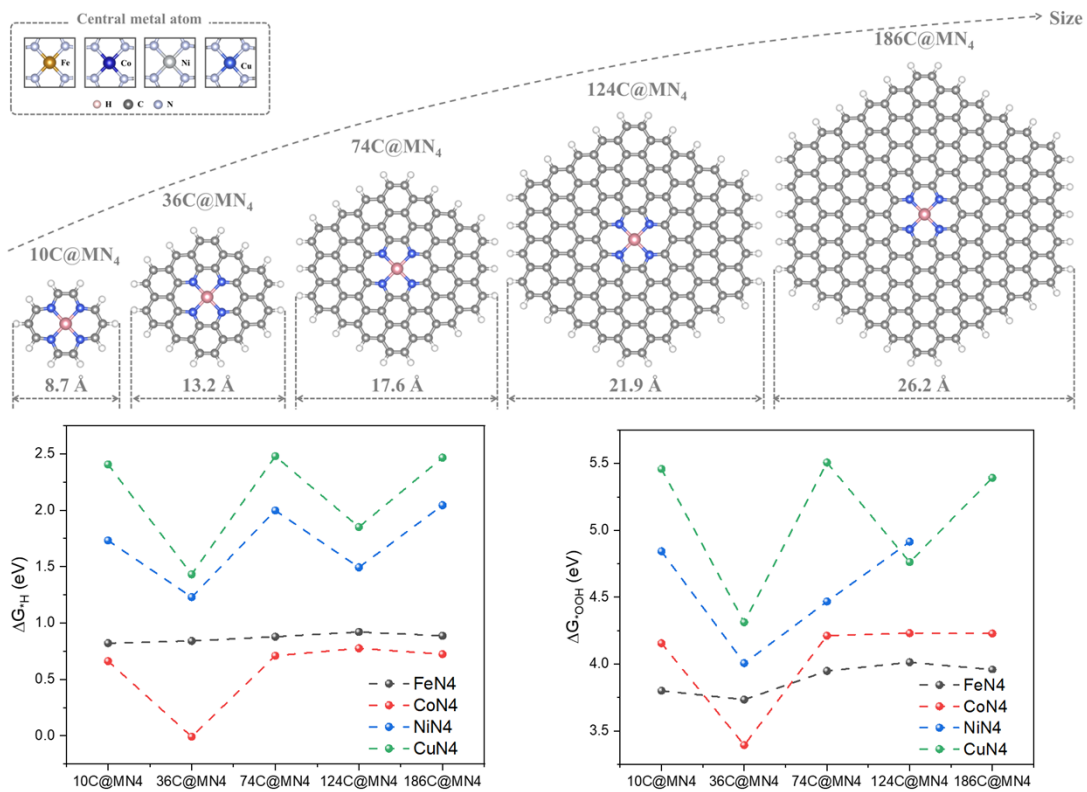

Figure S39. MN<sub>4</sub> configurations of different sizes and their effects on adsorption properties of \*H and \*OOH.

**References:**

- (1) J. G. Brandenburg, C. Bannwarth, A. Hansen and S. Grimme, *Journal of Chemical Physics*, 2018, 148, 064104.
- (2) F. Neese, *Wiley Interdiscip Rev Comput Mol Sci*, 2017, e1327.
- (3) F. Neese, *Wiley Interdiscip Rev Comput Mol Sci*, 2022, 12.
- (4) F. Neese, F. Wennmohs, U. Becker and C. Riplinger, *Journal of Chemical Physics*, 2020, 152, 224108.
